# Supplementary material
Source: publisher figshare collection journal article supplement (https://acs.figshare.com/ndownloader/files/4505119)

## *Supporting Information*

### **Palladium-Catalyzed Silylene-1,3-Diene [4+1] Cycloaddition with Use of (Aminosilyl)boronic Esters as Synthetic Equivalents of Silylene**

*Department of Synthetic Chemistry and Biological Chemistry, Graduate School of Engineering,*

*Kyoto University, Katsura, Kyoto 615-8510, Japan*

Toshimichi Ohmura, Kohei Masuda, Ichiro Takase, and Michinori Suginome\*

suginome@sbchem.kyoto-u.ac.jp

#### Contents

|                                                                                                       |     |     |
|-------------------------------------------------------------------------------------------------------|-----|-----|
| 1. General Remarks                                                                                    | --- | S2  |
| 2. Experimental Procedures                                                                            | --- | S2  |
| 2.1 Materials                                                                                         | --- | S2  |
| 2.2 Palladium-Catalyzed Reaction of Silylboronic Ester <b>1</b> with Diene <b>2a</b> (Table 1)        | --- | S4  |
| 2.3 Palladium-Catalyzed Reaction of <b>1a</b> and <b>5</b> with Dienes <b>2</b> (Table 2)             | --- | S4  |
| 2.4 Reaction of 1,3-Butadiene ( <b>2o</b> ) with <b>5</b> (eq 1)                                      | --- | S10 |
| 2.5 Reaction of <b>2p</b> with <b>1a</b> (eqs 2 and 3)                                                | --- | S11 |
| 2.6 Reaction of 1,3-Cyclohexadiene ( <b>2q</b> ) with <b>5</b> (eq 4)                                 | --- | S13 |
| 2.7 Synthesis of 2,4- and 2,5-Diarylsiloles from 1,3-Dienes (Scheme 1)                                | --- | S14 |
| 2.7.1 Preparation of 1,3- and 1,4-Diaryl-1,3-butadienes                                               | --- | S14 |
| 2.7.2 Palladium-Catalyzed Reaction of Diene <b>2</b> with Silylboronic Ester <b>1a</b>                | --- | S16 |
| 2.7.3 Conversion of <b>3</b> to 2,4- and 2,5-Diarylsiloles                                            | --- | S18 |
| 2.7.4 Photophysical Properties of <b>7-11</b>                                                         | --- | S22 |
| 3. Copies of <sup>1</sup> H, and <sup>13</sup> C NMR Spectra that do not have elemental analysis data | --- | S23 |

## 1. General Remarks

All reactions were performed in a drybox or using Schlenk technique under an atmosphere of nitrogen or argon with magnetic stirring. Column chromatography was performed with Ultra Pure Silica Gel (SILICYCLE, pH 7.0, 40-63  $\mu\text{m}$ , 60Å).  $^1\text{H}$  NMR spectra were recorded on Varian Mercury-400 (400.44 MHz) or JEOL-JNM-500 (500.00 MHz) spectrometers.  $^{13}\text{C}$  NMR spectra were recorded on a JEOL-JNM-500 (125.65 MHz) spectrometer.  $^{11}\text{B}$  NMR spectra were recorded on a Varian Mercury-400 (128.48 MHz) spectrometer. Chemical shifts were reported in ppm downfield from tetramethylsilane (for  $^1\text{H}$ ,  $^{13}\text{C}$ ) and  $\text{Et}_2\text{O} \cdot \text{BF}_3$  (for  $^{11}\text{B}$ ). Elemental analyses were performed by Elemental Analysis Center of Kyoto University. High resolution mass spectra were recorded on JEOL JMS-MS700 or JMS-SX102A spectrometers. UV-visible spectra were recorded on a JASCO V-550. Fluorescence spectra were recorded on a JASCO FP-6300.

## 2. Experimental Procedures

### 2.1 Materials

Toluene was dried and degassed by The Ultimate Solvent System (GlassContour). Benzene- $d_6$  was dried with  $\text{CaH}_2$  and distilled. Silylboronic esters **1a-c** and **5** were prepared as reported procedure.<sup>1</sup> Dienes **2a**<sup>2</sup>, **2b**<sup>3</sup>, **2d**<sup>4</sup>, **2f**<sup>5</sup>, **2h**<sup>6</sup>, **2j**<sup>6</sup>, **2l**<sup>7</sup>, **2m**<sup>8</sup>, (*E,E*)-**2p**<sup>9</sup>, and (*E,Z*)-**2p**<sup>10</sup> were prepared as reported procedures. Dienes **2e** was similarly prepared as known procedure.<sup>11</sup> Dienes **2c**, **2g**, **2k**, and **2q** were purchased from TCI and distilled and degassed prior to use. Synthesis of **2i** and its analogues was described later (see section 2.7.1). Diene **2n** was prepared as describes bellow. 1,3-Butadiene (**2o**) was purchased from TCI and used without further purification.  $\text{PPh}_3$  (Wako),  $\text{PPh}_2\text{Me}$  (Strem), *p*-chloranil (TCI), and DDQ (TCI) were used as received.  $\text{Pd}(\text{dba})_2$  was

---

<sup>1</sup> Ohmura, T.; Masuda, K.; Furukawa, H.; Sugimoto, M. *Organometallics* **2007**, 26, 1291.

<sup>2</sup> Negishi, E.; Takahashi, T.; Baba, S.; Van. Horn, David E.; Okukado, M. *J. Am. Chem. Soc.* **1987**, 109, 2393.

<sup>3</sup> Blake, Michael E.; Bartlett, Kevin L.; Jones, Maitland, Jr. *J. Am. Chem. Soc.* **2003**, 125, 6485.

<sup>4</sup> Nunomoto, S.; Kawakami, Y.; Yamashita, Y. *Bull. Chem. Soc. Jpn.* **1981**, 54, 2831.

<sup>5</sup> Fleming, F. F.; Jiang T. *J. Org. Chem.* **1997**, 62, 7890.

<sup>6</sup> Urabe, H.; Mitsui, K.; Ohta, S.; Sato, F. *J. Am. Chem. Soc.* **2003**, 125, 6074.

<sup>7</sup> Araki, S.; Ohmura, M.; Butsugan, Y. *Synthesis*, **1985**, 10, 963.

<sup>8</sup> Nguyen Anh Le; Jones, Maitland, Jr.; Bickelhaupt, Friedrich; De Wolf, Willem H. *J. Am. Chem. Soc.* **1989**, 111, 8491.

<sup>9</sup> Zweifel, G.; Miller R. L. *J. Am. Chem. Soc.* **1970**, 92, 6678.

<sup>10</sup> Zweifel, G.; Polston, L. N.; Whitney, C. C. *J. Am. Chem. Soc.* **1968**, 90, 6243.

<sup>11</sup> Stevens M. Sparks, Chun P. Chow, Liang Zhu, and Kenneth, J. Shea *J. Org. Chem.* **2004**, 69, 3025.

prepared from PdCl<sub>2</sub> (Tanaka Kikinzoku Kogyo, Guaranteed Grade) as reported procedure.<sup>12</sup>

**Methyl 3-methylene-1-hexenoate (2e)**

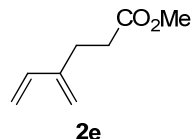

<sup>1</sup>H NMR (500 MHz, CDCl<sub>3</sub>)  $\delta$  6.37 (dd,  $J$  = 18.0, 11.0 Hz, 1H), 5.25 (d,  $J$  = 18.0 Hz, 1H), 5.09 (d,  $J$  = 11.0 Hz, 1H), 5.04 (s, 1H), 5.01 (s, 1H), 3.68 (s, 3H), 2.50-2.58 (m, 4H); <sup>13</sup>C NMR (CDCl<sub>3</sub>, 125 MHz)  $\delta$  173.6, 144.6, 138.3, 116.1, 113.5, 51.6, 32.8, 26.4; Anal. Calcd. for C<sub>8</sub>H<sub>12</sub>O<sub>2</sub>: C, 68.54; H, 8.63; Found. C, 68.34; H, 8.81.

**(E)- 3-Methyl-2-phenyl-1,3-pentadiene (2n)<sup>13</sup>**

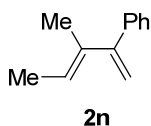

To a solution of (*E*)-2-bromo-2-butene (Aldrich, 1.1 g, 8.2 mmol) and NiCl<sub>2</sub>(dppp)<sup>14</sup> (100 mg, 0.16 mmol) in THF (5 mL) was added a THF solution of  $\alpha$ -(bromomagnesio)styrene, which was prepared from  $\alpha$ -bromostyrene (Aldrich, 2.2 g, 12 mmol) and magnesium (Nacalai, 580 mg, 24 mg-atom) in THF (15 mL), and the mixture stirred and heated to reflux for 2 h. The flask was cooled to room temperature, and the reaction mixture was quenched with water (50 mL) and 2N HCl (20 mL). The mixture was extracted with Et<sub>2</sub>O (30 mL, twice). The extracts were dried over MgSO<sub>4</sub> and concentrated by rotary evaporator. The crude oil was purified by bulb-to-bulb distillation (150 °C/ 90 mmHg) to afford **2n** (0.85 g, 66%) as colorless liquid. <sup>1</sup>H NMR (500 MHz, CDCl<sub>3</sub>)  $\delta$  7.23-7.35 (m, 5H), 5.46 (q,  $J$  = 7.0 Hz, 1H), 5.19 (d,  $J$  = 1.5 Hz, 1H), 5.01 (d,  $J$  = 1.5 Hz, 1H), 1.84 (s, 3H), 1.70 (d,  $J$  = 7.0 Hz, 3H); <sup>13</sup>C NMR (CDCl<sub>3</sub>, 125 MHz)  $\delta$  152.7, 142.0, 136.1, 128.6, 127.8, 127.0, 126.3, 111.6, 14.4, 14.1.

<sup>12</sup> Ukai, T.; Kawazura, H.; Ishii, Y.; Bonnet, J. J.; Ibers, J. A. *J. Organomet. Chem.* **1974**, 65, 253.

<sup>13</sup> An alternate route to **2n**, see Nakayama, J.; Machida, H.; Saito, R.; Akimoto, K.; Hosono, M. *Chem. Lett.* **1985**, 1173.

<sup>14</sup> Van Heck, G. R.; Horrocks, Jr. W. D. *Inorg. Chem.* **1966**, 5, 1968.

## 2.2 Palladium-Catalyzed Reaction of Silylboronic Ester **1** with Diene **2a** (Table 1)

### General Procedure

To a solution of Pd(dba)<sub>2</sub> (0.30  $\mu$ mol), ligand (0, 0.36, 0.72, or 1.44  $\mu$ mol), Bn<sub>2</sub>O (30 mg, internal standard) and **2a** (0.33 mmol) in C<sub>6</sub>D<sub>6</sub> (0.15 mL) was added **1** (0.30 mmol). The mixture was stirred for 3 h at room temperature. To determine the yield of **3a**, the reaction mixture was then analyzed by GC. The yield of **4**<sup>15</sup> was estimated by <sup>1</sup>H NMR.

### 1,1-Dimethyl-2-hexyl-1-silacyclopent-3-ene (**3a**)

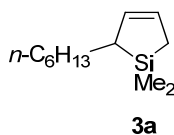

The best result (entry 2 in Table 1) was obtained by the following procedure, which was almost identical that described above. Pd(dba)<sub>2</sub> (2.3 mg, 4.0  $\mu$ mol) and PPh<sub>2</sub>Me (0.96 mg, 4.8  $\mu$ mol) were dissolved in toluene (200  $\mu$ L) and the mixture was stirred for 5 min at room temperature. 1,3-Decadiene (**2a**) (53 mg, 0.38 mmol) and silylboronic ester **1a** (111 mg, 0.43 mmol) were added to the mixture, and the resulting mixture was stirred at room temperature for 14 h. Bulb-to-bulb distillation (100 °C/3.0 mmHg) of the crude products gave **3a** as colorless liquid (47 mg, 63%). <sup>1</sup>H NMR (400 MHz, CDCl<sub>3</sub>)  $\delta$  5.74-5.83 (m, 2H), 1.49-1.55 (m, 1H), 1.22-1.46 (m, 12H), 0.90 (t, *J* = 7.0 Hz, 3H), 0.19 (s, 3H), 0.09 (s, 3H); <sup>13</sup>C NMR(CDCl<sub>3</sub>, 125 MHz)  $\delta$  137.1, 129.1, 31.9, 31.2, 30.6, 30.2, 29.5, 22.7, 18.0, 14.1, -1.9, -5.0; HRMS (EI) Calcd for C<sub>12</sub>H<sub>24</sub>Si (M<sup>+</sup>): *m/z* 196.1647; Found 196.1648.

*Additional Note:* The Pd/PPh<sub>3</sub> catalyst, which showed the best results for reaction of terminal alkynes with **1a**,<sup>15</sup> afforded 17% of **3a** with 36% of **4a** (entry 1, Table 1). The remainder is unreacted **1a** and **2a**. The efficiency of the silylene equivalent formation seems to depend on the unsaturated hydrocarbons used, probably because coordination of the substrates to palladium plays an important role in the catalytic cycle.

<sup>15</sup> Ohmura, T.; Masuda, K.; Suginome, M. *J. Am. Chem. Soc.* **2008**, *130*, 1526.

## 2.3 Palladium-Catalyzed Reaction of Silylboronic Esters **1a** and **5** with Dienes **2** (Table 2)

### General Procedures

**Procedure A:** To a solution of Pd(dba)<sub>2</sub> (2.3 mg, 0.40  $\mu$ mol), PMePh<sub>2</sub> (1.0 mg, 0.48  $\mu$ mol), and 1,3-Diene **2** (0.44-0.68 mmol) in toluene (0.2 mL) was added silylboronic esters **1a** or **5** (0.40 mmol), and the mixture was stirred for several hours at room temperature (for **1a**) or 50 °C (for **5**). After the reaction, the crude product was purified by silica gel column chromatography. **Procedure B:** To a solution of Pd(dba)<sub>2</sub> (2.3 mg, 0.40  $\mu$ mol), PMePh<sub>2</sub> (1.0 mg, 0.48  $\mu$ mol), and 1,3-Diene **2** (0.40 mmol) in toluene (0.2 mL) was added silylboronic ester **1a** (0.44 mmol), and the mixture was stirred for several hours at room temperature. After the reaction, the crude product was purified by silica gel column chromatography. The procedure B was useful when the separation of the product and starting diene **2** was difficult, because remaining silylboronic ester could be easily removed through silica gel column chromatography.

### 1,1-Dimethyl-2-phenyl-1-silacyclopent-3-ene (**3b**, entry 1)

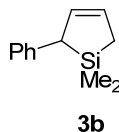

According to the *Procedure B*, **2b** (257 mg, 2.0 mmol) was reacted with **1a** (569 mg, 2.2 mmol) for 5 h. Purification of the products by chromatography on silica gel (eluent: hexane,  $R_f$  = 0.60) afforded **3b** as a colorless liquid (343 mg, 93%). <sup>1</sup>H NMR (400 MHz, CDCl<sub>3</sub>)  $\delta$  7.20-7.27 (m, 2H), 7.04-7.10 (m, 1H), 6.97-7.02 (m, 2H), 6.10 (ddt,  $J$  = 6.8, 3.6, 2.0 Hz, 1H), 5.91 (ddt,  $J$  = 6.8, 3.6, 2.0 Hz, 1H), 3.08-3.11 (m, 1H), 1.45 (ddt,  $J$  = 18.0, 3.6, 2.0 Hz, 1H), 1.38 (ddt,  $J$  = 18.0, 3.6, 2.0 Hz, 1H), 0.27 (s, 3H), -0.28 (s, 3H); <sup>13</sup>C NMR (CDCl<sub>3</sub>, 125 MHz)  $\delta$  144.0, 134.3, 132.1, 128.3, 126.4, 124.1, 39.5, 17.8, -2.2, -4.4; Anal. Calcd. for C<sub>12</sub>H<sub>16</sub>Si: C, 76.53; H, 8.56; Found: C, 76.82; H, 8.62.

### 1,1,2-Triphenyl-1-silacyclopent-3-ene (**6b**, entry 2)

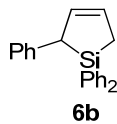

According to the *Procedure A*, **2b** (64 mg, 0.49 mmol) was reacted with **5** (173 mg, 0.45 mmol) at 50 °C for 18 h. Chromatography on silica gel (eluent: hexane/Et<sub>2</sub>O = 50/1,  $R_f$  = 0.25) afforded **6b** as a colorless

liquid (109 mg, 77%).  $^1\text{H}$  NMR (400 MHz,  $\text{CDCl}_3$ )  $\delta$  7.63-7.67 (m, 2H), 7.38-7.47 (m, 3H), 7.20-7.26 (m, 1H), 7.05-7.14 (m, 6H), 6.91-7.00 (m, 3H), 6.27-6.33 (m, 1H), 6.03-6.10 (m, 1H), 3.73 (br s, 1H), 2.14 (ddt,  $J = 18.4$ , 3.2, 2.0 Hz, 1H), 1.92 (ddt,  $J = 18.4$ , 3.2, 2.0 Hz, 1H);  $^{13}\text{C}$  NMR ( $\text{CDCl}_3$ , 125 MHz)  $\delta$  142.6, 135.5, 135.3, 135.1, 134.8, 132.4, 131.7, 129.7, 129.2, 128.04, 128.03, 127.3, 127.1, 124.3, 39.2, 16.3; Anal. Calcd. for  $\text{C}_{22}\text{H}_{20}\text{Si}$ : C, 84.56; H, 6.45; Found: C, 84.83; H, 6.51.

### 3-Methyl-1,1-diphenyl-1-silacyclopent-3-ene (**6c**, entry 3)<sup>16</sup>

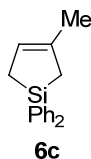

According to the *Procedure A*, **2c** (47 mg, 0.69 mmol) was reacted with **5** (153 mg, 0.40 mmol) at 50 °C for 3 h. Chromatography on silica gel (eluent: hexane,  $R_f = 0.40$ ) afforded **6c** as a colorless liquid (82 mg, 82%).  $^1\text{H}$  NMR (400 MHz,  $\text{CDCl}_3$ )  $\delta$  7.54-7.59 (m, 4H), 7.34-7.43 (m, 6H), 5.64-5.67 (m, 1H), 1.85 (s, 3H+2H), 1.78 (s, 2H);  $^{13}\text{C}$  NMR ( $\text{CDCl}_3$ , 125 MHz)  $\delta$  140.1, 136.2, 134.7, 129.4, 127.9, 124.7, 22.6, 21.7, 17.6; Anal. Calcd. for  $\text{C}_{17}\text{H}_{18}\text{Si}$ : C, 81.54; H, 7.25; Found: C, 81.79; H, 7.21.

### 1,1-Dimethyl-3-phenyl-1-silacyclopent-3-ene (**3d**, entry 4)

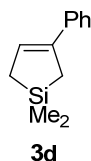

According to the *Procedure A*, **2d** (72 mg, 0.55 mmol) was reacted with **1a** (102 mg, 0.40 mmol) for 24 h. Chromatography on silica gel (eluent: hexane,  $R_f = 0.57$ ) afforded **3d** as a colorless liquid (63 mg, 84%).  $^1\text{H}$  NMR (400 MHz,  $\text{CDCl}_3$ )  $\delta$  7.49-7.52 (m, 2H), 7.29-7.34 (m, 2H), 7.19-7.24 (m, 1H), 6.38 (tt,  $J = 3.6$ , 1.8 Hz, 1H), 1.71 (q,  $J = 1.8$  Hz, 2H), 1.55 (dt,  $J = 3.6$ , 1.8 Hz, 2H), 0.26 (s, 6H);  $^{13}\text{C}$  NMR ( $\text{CDCl}_3$ , 125 MHz)  $\delta$  141.6, 140.8, 128.1, 127.2, 126.6, 125.6, 19.4, 19.3, -1.8; HRMS (EI)  $m/z$  Calcd for  $\text{C}_{12}\text{H}_{16}\text{Si}$  ( $\text{M}^+$ ): 188.1021, Found: 188.1021. Anal. Calcd. for  $\text{C}_{12}\text{H}_{16}\text{Si}$ : C, 76.53; H, 8.56; Found: C, 76.32; H, 8.62.

<sup>16</sup> Rieke, R. D.; Xiong, H. *J. Org. Chem.* **1991**, 56, 3109.

**3-(2-Methoxycarbonylethyl)-1,1-dimethyl-1-silacyclopent-3-ene (3e, entry 5)**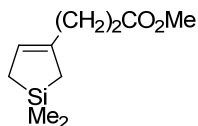**3e**

According to the *Procedure A*, **2e** (63 mg, 0.49 mmol) was reacted with **1a** (105 mg, 0.41 mmol) for 21 h. Chromatography on silica gel (eluent: hexane/Et<sub>2</sub>O = 10/1, *R<sub>f</sub>* = 0.34) afforded **3e** as a colorless liquid (62 mg, 77%). <sup>1</sup>H NMR (400 MHz, CDCl<sub>3</sub>) δ 5.52 (tt, *J* = 3.2, 1.6 Hz, 1H), 3.66 (s, 3H), 2.35-2.47 (m, 4H), 1.27 (dt, *J* = 3.2, 1.6 Hz, 2H), 1.19-1.22 (m, 2H), 0.15 (s, 6H); <sup>13</sup>C NMR (CDCl<sub>3</sub>, 125 MHz) δ 174.0, 142.0, 124.9, 51.4, 32.7, 31.8, 20.3, 18.3, -1.9; Anal. Calcd. for C<sub>10</sub>H<sub>18</sub>O<sub>2</sub>Si: C, 60.56; H, 9.15; Found. C, 60.42; H, 9.10.

**3-(2-Cyanoethyl)-1,1-dimethyl-1-silacyclopent-3-ene (3f, entry 6)**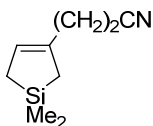**3f**

According to the *Procedure A*, **2f** (51 mg, 0.48 mmol) was reacted with **1a** (104 mg, 0.40 mmol) for 2 h. Chromatography on silica gel (eluent: hexane/Et<sub>2</sub>O = 5/1, *R<sub>f</sub>* = 0.36) afforded **3f** as a colorless liquid (47 mg, 71%). <sup>1</sup>H NMR (400 MHz, CDCl<sub>3</sub>) δ 5.66 (tt, *J* = 3.2, 1.6 Hz, 1H), 2.38-2.49 (m, 4H), 1.33 (dt, *J* = 3.2, 1.6 Hz, 2H), 1.19-1.23 (m, 2H), 0.18 (s, 6H); <sup>13</sup>C NMR (CDCl<sub>3</sub>, 125 MHz) δ 139.6, 127.3, 119.7, 32.1, 19.9, 18.3, 15.9, -1.9; HRMS (EI) *m/z* Calcd for C<sub>9</sub>H<sub>15</sub>NSi (M<sup>+</sup>): 165.0974, Found: 165.0970.

**1,1-Dimethyl-3-(4-methyl-3-penten-1-yl)-1-silacyclopent-3-ene (3g, entry 7)**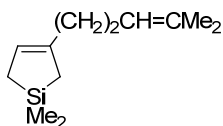**3g**

According to the *Procedure A*, **2g** (88 mg, 0.65 mmol) was reacted with **1a** (103 mg, 0.40 mmol) for 20 h. Chromatography on silica gel (eluent: hexane, *R<sub>f</sub>* = 0.75) afforded **3g** as a colorless liquid (55 mg, 71%). <sup>1</sup>H NMR (400 MHz, CDCl<sub>3</sub>) δ 5.47-5.53 (m, 1H), 5.06-5.13 (m, 1H), 2.04-2.14 (m, 4H), 1.68 (s, 3H), 1.60 (s, 3H), 1.28 (dt, *J* = 3.2, 1.6 Hz, 2H), 1.20-1.23 (m, 2H), 0.15 (s, 6H); <sup>13</sup>C NMR (CDCl<sub>3</sub>, 125 MHz) δ 143.9, 131.1, 124.6, 124.0, 36.7, 26.4, 25.7, 20.4, 18.3, 17.7, -1.8; Anal. Calcd. for C<sub>12</sub>H<sub>22</sub>Si: C, 74.14; H, 11.41. Found: C, 74.12; H, 11.47.

**1,1-Dimethyl-3-(dimethylphenylsilyloxy)-1-silacyclopent-3-ene (3h, entry 8)**

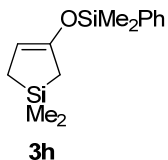

According to the *Procedure B*, **2h** (206 mg, 1.0 mmol) was reacted with **1a** (269 mg, 1.1 mmol) for 4 h. Chromatography on silica gel (eluent: hexane,  $R_f$  = 0.42) afforded **3h** as a colorless liquid (218 mg, 82%).  $^1\text{H}$  NMR (400 MHz,  $\text{CDCl}_3$ )  $\delta$  7.58-7.62 (m, 2H), 7.34-7.41 (m, 3H), 4.89 (tt,  $J$  = 3.2, 1.6 Hz, 1H), 1.33 (q,  $J$  = 1.6 Hz, 2H), 1.21 (dt,  $J$  = 3.2, 1.6 Hz, 2H), 0.44 (s, 6H), 0.14 (s, 6H);  $^{13}\text{C}$  NMR ( $\text{CDCl}_3$ , 125 MHz)  $\delta$  153.8, 138.0, 133.4, 129.6, 127.8, 106.5, 21.4, 14.8, -0.9, -1.6; Anal. Calcd. for  $\text{C}_{14}\text{H}_{22}\text{OSi}_2$ : C, 64.06; H, 8.45. Found: C, 64.10; H, 8.54.

**1,1-Dimethyl-2,4-Diphenyl-1-silacyclopent-3-ene (3i, entry 9)**

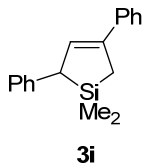

According to the *Procedure B*, **2i** (207 mg, 1.0 mmol) was reacted with **1a** (279 mg, 1.1 mmol) for 3 h. Chromatography on silica gel (eluent: hexane/ $\text{Et}_2\text{O}$  = 40/1,  $R_f$  = 0.50) afforded **3i** as a colorless liquid (251 mg, 94%).  $^1\text{H}$  NMR (400 MHz,  $\text{CDCl}_3$ )  $\delta$  7.58-7.61 (m, 2H), 7.33-7.38 (m, 3H), 7.23-7.28 (m, 2H), 7.07-7.12 (m, 1H), 7.03-7.05 (m, 2H), 6.42 (dt,  $J$  = 2.8, 1.8 Hz, 1H), 3.32-3.35 (m, 1H), 1.87 (dt,  $J$  = 17.6, 1.8 Hz, 1H), 1.80 (dt,  $J$  = 17.6, 1.8 Hz, 1H), 0.35 (s, 3H), -0.20 (s, 3H);  $^{13}\text{C}$  NMR ( $\text{CDCl}_3$ , 125 MHz)  $\delta$  143.9, 142.7, 140.2, 130.3, 128.3, 128.2, 127.1, 126.4, 125.8, 124.3, 40.6, 19.3, -2.1, -4.2; Anal. Calcd. for  $\text{C}_{18}\text{H}_{20}\text{Si}$ : C, 81.76; H, 7.62. Found: C, 81.54; H, 7.44.

**2-Butyl-1,1-dimethyl-3-(dimethylphenylsilyloxy)-1-silacyclopent-3-ene (3j, entry 10)**

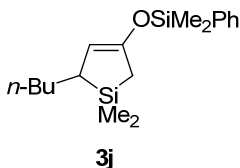

According to the *Procedure B*, **2j** (101 mg, 0.38 mmol) was reacted with **1a** (110 mg, 0.43 mmol) for 15 h. Chromatography on silica gel (eluent: hexane/ $\text{Et}_2\text{O}$  = 20/1,  $R_f$  = 0.63) afforded **3j** as a colorless liquid (113 mg, 92%).  $^1\text{H}$  NMR (400 MHz,  $\text{CDCl}_3$ )  $\delta$  7.58-7.63 (m, 2H), 7.35-7.42 (m, 3H), 4.88 (dt,  $J$  = 3.6, 1.2 Hz,



1H), 1.44-1.50 (m, 1H), 1.34 (t,  $J = 1.2$  Hz, 2H), 1.12-1.36 (m, 6H), 0.87 (t,  $J = 7.2$  Hz, 3H), 0.45 (s, 6H), 0.12 (s, 3H), 0.07 (s, 3H);  $^{13}\text{C}$  NMR ( $\text{CDCl}_3$ , 125 MHz)  $\delta$  152.7, 137.9, 133.4, 129.6, 127.7, 112.8, 32.2, 31.7, 27.6, 22.8, 21.5, 14.1, -0.9, -1.0, -1.6, -4.7; Anal. Calcd. for  $\text{C}_{18}\text{H}_{30}\text{OSi}_2$ : C, 67.86; H, 9.49. Found: C, 67.96; H, 9.51.

**3,4-Dimethyl-1,1-diphenyl-1-silacyclopent-3-ene (6k, entry 11)<sup>17</sup>**

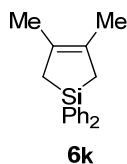

According to the *Procedure A*, **2k** (51 mg, 0.62 mmol) was reacted with **5** (149 mg, 0.39 mmol) at 50 °C for 12 h. Chromatography on silica gel (eluent: hexane,  $R_f = 0.35$ ) afforded **6k** as a colorless liquid (81 mg, 79%).  $^1\text{H}$  NMR (400 MHz,  $\text{CDCl}_3$ )  $\delta$  7.54-7.62 (m, 4H), 7.34-7.44 (m, 6H), 1.88 (s, 4H), 1.79 (s, 6H);  $^{13}\text{C}$  NMR ( $\text{CDCl}_3$ , 125 MHz)  $\delta$  136.4, 134.7, 130.7, 129.3, 127.9, 24.2, 19.3.

**3,4-Dihexyl-1,1-dimethyl-1-silacyclopent-3-ene (3l, entry 12)**

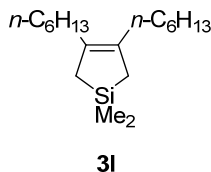

According to the *Procedure A*, **2l** (99 mg, 0.45 mmol) was reacted with **1a** (103 mg, 0.40 mmol) for 3 h. Chromatography on silica gel (eluent: hexane,  $R_f = 0.86$ ) afforded **3l** as a colorless liquid (94 mg, 84%).  $^1\text{H}$  NMR (400 MHz,  $\text{CDCl}_3$ )  $\delta$  2.05 (t,  $J = 7.6$  Hz, 4H), 1.20-1.39 (m, 20H), 0.89 (t,  $J = 6.8$  Hz, 6H), 0.12 (s, 6H);  $^{13}\text{C}$  NMR ( $\text{CDCl}_3$ , 125 MHz)  $\delta$  135.1, 32.8, 31.9, 29.3, 28.2, 22.7, 22.3, 14.1, -2.1; Anal. Calcd. for  $\text{C}_{18}\text{H}_{36}\text{Si}$ : C, 77.06; H, 12.93. Found: C, 77.20; H, 13.20.

**2,3,4,5,6,7-Hexahydro-2,2-dimethyl-1H-2-silaindene (3m, entry 13)**

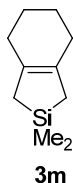

According to the *Procedure A*, **2m** (50 mg, 0.55 mmol) was reacted with **1a** (102 mg, 0.40 mmol) for

<sup>17</sup> Wu, T. C.; Xiong, H.; Rieke, R. D. *J. Org. Chem.* **1990**, *55*, 5045.

6 h. Chromatography on silica gel (eluent: hexane,  $R_f$  = 0.81) afforded **3m** as a colorless liquid (55 mg, 84%).  $^1\text{H}$  NMR (400 MHz,  $\text{CDCl}_3$ )  $\delta$  1.97 (m, 4H), 1.55-1.64 (m, 4H), 1.23-1.27 (m, 4H), 0.16 (s, 6H);  $^{13}\text{C}$  NMR ( $\text{CDCl}_3$ , 125 MHz)  $\delta$  133.0, 31.2, 23.9, 23.6, -1.7; HRMS (EI)  $m/z$  Calcd for  $\text{C}_{10}\text{H}_{17}\text{Si}$  ( $[\text{M}-\text{H}]^+$ ): 165.1100; Found: 165.1099.

#### 1,1,2,3-Tetramethyl-4-phenyl-1-silacyclopent-3-ene (**3n**, entry 14)

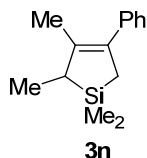

According to the *Procedure B*, **2n** (63 mg, 0.40 mmol) was reacted with **1a** (115 mg, 0.45 mmol) for 20 h. Chromatography on silica gel (eluent: hexane,  $R_f$  = 0.68) afforded **3n** as a colorless liquid (74 mg, 86%).  $^1\text{H}$  NMR (400 MHz,  $\text{CDCl}_3$ )  $\delta$  7.28-7.33 (m, 2H), 7.15-7.23 (m, 3H), 1.71-1.74 (m, 3H), 1.64-1.69 (m, 2H), 1.57-1.62 (m, 1H), 1.11 (d,  $J$  = 8.0 Hz, 3H), 0.17 (s, 3H), 0.15 (s, 3H);  $^{13}\text{C}$  NMR ( $\text{CDCl}_3$ , 125 MHz)  $\delta$  143.7, 139.4, 134.7, 128.2, 127.7, 125.7, 29.6, 23.9, 16.8, 13.9, -2.6, -5.0; HRMS (EI)  $m/z$  Calcd for  $\text{C}_{14}\text{H}_{20}\text{Si}$  ( $\text{M}^+$ ): 216.1334; Found: 216.1335.

The corresponding *Z* isomer of **2n** did not react under the identical reaction conditions.

## 2.4 Reaction of 1,3-Butadiene (**2o**) with **5** (eq 1)

### 1,1-Diphenyl-1-silacyclopent-3-ene (**6o**)<sup>18</sup>

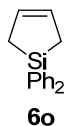

$\text{Pd}(\text{dba})_2$  (2.3 mg, 4.0  $\mu\text{mol}$ ),  $\text{PPh}_2\text{Me}$  (0.96 mg, 4.8  $\mu\text{mol}$ ), and **5** (160 mg, 0.42 mmol) were placed in a glass tube having PTFE stopcock (J. Young). The mixture was dissolved in toluene (1.0 mL), and the resultant solution was stirred for 5 min at room temperature. 1,3-Butadiene gas (**2o**) (22.4 mL, 1.0 mmol) was passed through the solution via a disposable syringe equipped with stainless needle. The tube was sealed by the stopcock and the reaction mixture was stirred for 15 h at 50 °C. Purification of the product by chromatography

<sup>18</sup> Mignani, S.; Damour, D.; Bastart, J.-P.; Manuel, G. *Synth. Commun.* **1995**, 25, 3855.

on silicagel (eluent: hexane/Et<sub>2</sub>O = 20/1,  $R_f$  = 0.75) afforded **6o** as a colorless liquid (83 mg, 84%). <sup>1</sup>H NMR (400 MHz, CDCl<sub>3</sub>)  $\delta$  7.55-7.60 (m, 4H), 7.34-7.44 (m, 6H), 6.04 (s, 2H), 1.85 (d,  $J$  = 1.2 Hz, 4H); <sup>13</sup>C NMR (CDCl<sub>3</sub>, 125 MHz)  $\delta$  135.8, 134.7, 131.0, 129.5, 127.9, 16.8; HRMS (EI)  $m/z$  Calcd for C<sub>16</sub>H<sub>16</sub>Si (M<sup>+</sup>): 236.1021; Found: 236.1022

## 2.5 Reaction of **2p** with **1a** (eqs 2 and 3)

### *cis*-2,5-Dibutyl-1,1-dimethyl-1-silacyclopent-3-ene (*cis*-**3p**, eq 2)

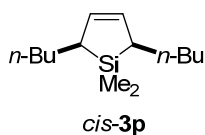

Pd(dba)<sub>2</sub> (4.6 mg, 8.0  $\mu$ mol) and PPh<sub>2</sub>Me (1.9 mg, 9.6  $\mu$ mol) were dissolved in toluene (200  $\mu$ L) and the mixture was stirred for 5 min at room temperature. To a mixture was added (*E,E*)-**2p** (*EE*:*EZ* = 99:1, 68 mg, 0.41 mmol) and **1a** (155 mg, 0.60 mmol) in this order, and the mixture was stirred at room temperature for 24 h. <sup>1</sup>H NMR analysis of the crude reaction mixture indicated formation of **3p** with the *cis*:*trans* ratio of 99:1. Purification of the products by chromatography on silica gel (eluent: hexane,  $R_f$  = 0.85) afforded *cis*-**3p** as a colorless liquid (84 mg, 92%). <sup>1</sup>H NMR (500 MHz, CDCl<sub>3</sub>)  $\delta$  5.69 (s, 2H), 1.52 (t,  $J$  = 7.0 Hz, 2H), 1.22-1.47 (m, 12H), 0.89 (t,  $J$  = 7.0 Hz, 6H), 0.19 (s, 3H), 0.00 (s, 3H); <sup>13</sup>C NMR (CDCl<sub>3</sub>, 125 MHz)  $\delta$  135.1, 32.4, 31.2, 31.1, 22.9, 14.1, -1.7, -8.4; Anal. Calcd. for C<sub>14</sub>H<sub>28</sub>Si: C, 74.91; H, 12.57. Found: C, 74.89; H, 12.77. Unequivocal methyl groups on the silicon atom indicate the *cis* structure. The stereochemistry was also confirmed by an nOe experiments.

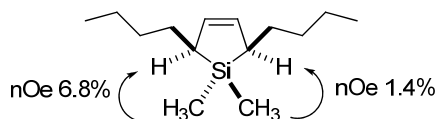

**Figure S1.** nOe experiment of *cis*-**3p** in CDCl<sub>3</sub>

### *trans*-2,5-Dibutyl-1,1-dimethyl-1-silacyclopent-3-ene (*trans*-**3p**, eq 3)

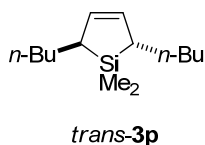

Pd(dba)<sub>2</sub> (6.9 mg, 12  $\mu$ mol) and PPh<sub>2</sub>Me (2.9 mg, 14  $\mu$ mol) were dissolved in toluene (200  $\mu$ L) and the mixture was stirred for 5 min at room temperature. To a mixture was added (*E,Z*)-**2p** (*EE*:*EZ* = 2:98, 68 mg,

0.41 mmol) and **1a** (155 mg, 0.60 mmol) in this order, and the mixture was stirred at room temperature for 10 h.  $^1\text{H}$  NMR analysis of the crude reaction mixture indicated formation of **3p** with the *cis:trans* ratio of 3:97. Purification of the products by chromatography on silica gel (eluent: hexane,  $R_f = 0.85$ ) afforded *trans*-**3p** as a colorless liquid (78 mg, 85%).  $^1\text{H}$  NMR (400 MHz,  $\text{CDCl}_3$ )  $\delta$  5.75 (d,  $J = 1.2$  Hz, 2H), 1.49-1.55 (m, 2H), 1.22-1.46 (m, 12H), 0.89 (t,  $J = 7.2$  Hz, 6H), 0.09 (s, 6H);  $^{13}\text{C}$  NMR ( $\text{CDCl}_3$ , 125 MHz)  $\delta$  135.5, 32.4, 30.9, 30.3, 22.9, 14.1, -4.6; Anal. Calcd. for  $\text{C}_{14}\text{H}_{28}\text{Si}$ : C, 74.91; H, 12.57. Found: C, 75.01; H, 12.79. Equivalent methyl groups on the silicon atom indicate the *trans* structure. The stereochemistry was also confirmed by an nOe experiments.

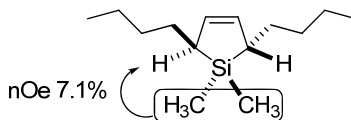

**Figure S2.** nOe experiment of *trans*-**3p** in  $\text{CDCl}_3$

## 2.6 Reaction of 1,3-Cyclohexadiene (**2q**) with **5** (eq 4)

### Optimization of the reaction conditions (Table S1).

Reaction of **2q** with **5** gave **6q** in only 22% yield under the conditions used for other dienes (entry 1). We found that the reaction took place more efficiently by the palladium catalyst having two or more phosphine ligand (entries 2 and 3).

**Table S1.** Optimization of Reaction Conditions

| <div><div><div><b>5</b></div><div>+</div><div></div><div><b>2q</b> (1.5 equiv)</div></div><div><div>Pd(dba)<sub>2</sub> (1.0 mol %)<br/>PMePh<sub>2</sub> (1.2–4.8 mol %)</div><div>toluene, 50 °C, 40 h</div></div><div><div></div><div><b>6q</b></div></div></div> |      |                        |
|------------------------------------------------------------------------------------------------------------------------------------------------------------------------------------------------------------------------------------------------------------------------------------------------------------------------------------------------------------------------------------------------------------------------------------------|------|------------------------|
| entry                                                                                                                                                                                                                                                                                                                                                                                                                                    | P/Pd | yield (%) <sup>a</sup> |
| 1 <sup>b</sup>                                                                                                                                                                                                                                                                                                                                                                                                                           | 1.2  | 22                     |
| 2                                                                                                                                                                                                                                                                                                                                                                                                                                        | 2.4  | 80                     |
| 3                                                                                                                                                                                                                                                                                                                                                                                                                                        | 4.8  | 95 (88) <sup>c</sup>   |

<sup>a</sup> GC yield. <sup>b</sup> 2.0 equiv of **2q** was used. <sup>c</sup> Isolated yield.

### 7,7-Diphenyl-7-silabicyclo[2.2.1]hept-2-ene (**6q**)

In the presence of Pd(dba)<sub>2</sub> (2.3 mg, 4.0 μmol) and PMePh<sub>2</sub> (3.8 mg, 19 μmol), **2q** (49 mg, 0.61 mmol) was reacted with **5** (147 mg, 0.39 mmol) in toluene (0.2 mL) at 50 °C for 40 h. Purification of the products by chromatography on silica gel (eluent: hexane/Et<sub>2</sub>O = 10/1, *R*<sub>f</sub> = 0.72) afforded **6q** as a white solid (90 mg, 88%). <sup>1</sup>H NMR (400 MHz, CDCl<sub>3</sub>) δ 7.52–7.56 (m, 4H), 7.31–7.40 (m, 4H), 7.22–7.27 (m, 2H), 6.43 (dd, *J* = 4.2, 3.2 Hz, 2H), 2.43–2.49 (m, 2H), 1.98–2.06 (m, 2H), 1.38–1.47 (m, 2H); <sup>13</sup>C NMR (CDCl<sub>3</sub>, 125 MHz) δ 137.0, 136.4, 134.1, 133.9, 133.0, 129.40, 129.37, 128.1, 127.4, 28.9, 25.2; Anal. Calcd. for C<sub>18</sub>H<sub>18</sub>Si: C, 82.38; H, 6.91. Found: C, 82.17; H, 7.00.

## 2.7 Synthesis of 2,4- and 2,5-Diarylsiloles from 1,3-Dienes (Scheme 1)

### 2.7.1 Preparation of 1,3- and 1,4-Diaryl-1,3-butadienes **2i** and **2r-u**

Dienes used in Scheme 1 are numbered as **2r-u** (Chart S1).

Chart S1.

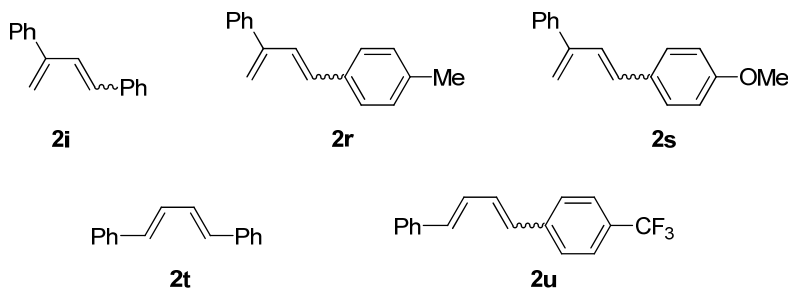

Dienes **2i**, **2r**, and **2s** were prepared from  $\alpha$ -methylstyrene (nacalai) according to the reported procedure (Scheme S1-A).<sup>19</sup> Diene **2u** was prepared from cinnamyl bromide (TCI) via the similar reactions (Scheme S1-B).<sup>19</sup> 1,4-Diphenyl-1,3-butadiene (**2t**) was purchased from Aldrich and used as received.

**Scheme S1.** Preparation of **2** via Wittig Reaction

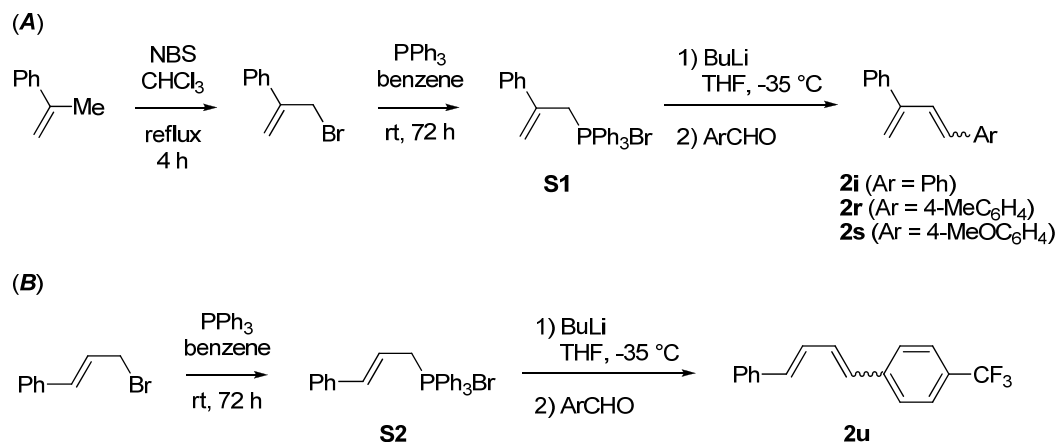

### Synthesis of **2i**

#### Bromination of $\alpha$ -Methylstyrene

To a solution of  $\alpha$ -methylstyrene (25 mL, 192 mmol) in CHCl<sub>3</sub> (30 mL) was added *N*-bromosuccinimide (NBS, 39 g, 220 mmol), and the mixture was heated to reflux for 4 h. After cooling the reaction mixture to room temperature, insoluble succinimide was removed by filtration. The filtrate was

<sup>19</sup> Mulzer, J.; Brüntrup, G.; Köhl, U.; Hartz, G. *Chem. Ber.* **1982**, *115*, 3453.

concentrated and distilled under the reduced pressure (72-80 °C/0.8 mmHg) to afford the  $\alpha$ -(bromomethyl)styrene (30 g, 80%). This compound is irritant substance for eyes.

### Preparation of Phosphonium Salt **S1**

To a solution of  $\alpha$ -(bromomethyl)styrene (30 g, 153 mmol) in benzene (100 mL) was added  $\text{PPh}_3$  (26 g, 99 mmol), and the mixture was stirred for 72 h at room temperature. The mixture was then filtrated and the filtered cake was washed with benzene twice. The crude cake was recrystallized from  $\text{CH}_2\text{Cl}_2/\text{Et}_2\text{O}$  to afford the phosphonium salt **S1** as a white solid (35.4 g, 78%).

### Diene Formation via Wittig Reaction

A suspension of the phosphonium salt **S1** (15 g, 33 mmol) in THF (300 mL) was cooled to -35 °C by dry ice/ $\text{CH}_3\text{CN}$  bath. BuLi (1.57 M, 20.8 mL) was added dropwise to the mixture. After stirring for 30 min at that temperature, freshly distilled benzaldehyde (3.5 g, 33 mmol) in THF (10 mL) was added dropwise to the mixture. After the addition, the resulting mixture was allowed to react at room temperature for 2 h. The volatile materials were removed by rotary evaporator. Hexane was added to the residue to extract products. Insoluble solid was removed by filtration. The crude products were purified by column chromatography on silica gel (eluent: hexane,  $R_f = 0.5$ ) to afford **2i** as a colorless liquid (5.3 g, 79%). GC and NMR analyses indicated that the product was a mixture of stereoisomer ( $E/Z = 45/55$ ).

### Synthesis of **2r**, **2s**, and **2u**

According to the procedure described above, **2r** was synthesized by the reaction of **S1** (10 g, 23 mmol) with *p*-tolualdehyde (Wako, 2.7 g, 22 mmol). Diene **2r** was obtained as a colorless liquid (3.1 g, 63%,  $E/Z = 50/50$ ) after purification by column chromatography on silica gel (eluent: hexane,  $R_f = 0.29$ ).

According to the procedure described above, **2s** was synthesized by the reaction of **S1** (5.5 g, 12 mmol) with *p*-anisaldehyde (TCI, 1.9 g, 14 mmol). Diene **2s** was obtained as a colorless liquid (1.6 g, 56%,  $E/Z = 41/59$ ) after purification by column chromatography on silica gel (eluent: hexane/ $\text{Et}_2\text{O} = 40/1$ ,  $R_f = 0.30$ ).

According to the procedure described above, **2u** was synthesized by the reaction of **S2** (9.5 g, 21 mmol) with *p*-trifluoromethylbenzaldehyde (TCI, 3.5 g, 20 mmol). Diene **2u** was obtained as a yellow solid (2.5 g, 45%,  $EE/EZ = 21/79$ ) after purification by column chromatography on silica gel (eluent: hexane/ $\text{Et}_2\text{O} = 10/1$ ,  $R_f = 0.70$ ).

## 2.7.2 Palladium-Catalyzed Reaction of Diene **2** with Silylboronic Ester **1a**

### 1,1-Dimethyl-2-(4-methylphenyl)-4-phenyl-1-silacyclopent-3-ene (**3r**)

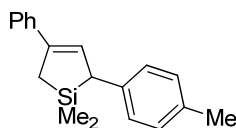

**3r**

According to the *Procedure B*, **2r** (214 mg, 0.97 mmol) was reacted with **1a** (268 mg, 1.0 mmol) for 3 h. Chromatography on silica gel (eluent: hexane/Et<sub>2</sub>O = 40/1, *R<sub>f</sub>* = 0.43) afforded **3r** as a colorless liquid (241 mg, 89%). <sup>1</sup>H NMR (400 MHz, CDCl<sub>3</sub>)  $\delta$  7.59 (d, *J* = 8.0 Hz, 2H), 7.35 (t, *J* = 8.0 Hz, 2H), 7.24-7.28 (m, 1H), 7.06 (d, *J* = 8.0 Hz, 2H), 6.93 (d, *J* = 8.0 Hz, 2H), 6.40-6.44 (m, 1H), 3.30 (br s, 1H), 2.31 (s, 3H), 1.86 (dt, *J* = 17.2, 1.6 Hz, 1H), 1.78 (dt, *J* = 17.2, 1.6 Hz, 1H), 0.33 (s, 3H), -0.18 (s, 3H); <sup>13</sup>C NMR (CDCl<sub>3</sub>, 125 MHz)  $\delta$  142.4, 140.7, 140.3, 133.6, 130.6, 129.0, 128.2, 127.0, 126.3, 125.8, 40.1, 20.9, 19.3, -2.1, -4.2; Anal. Calcd. for C<sub>19</sub>H<sub>22</sub>Si: C, 81.95; H, 7.96. Found: C, 81.70; H, 7.78.

### 2-(4-Methoxyphenyl)-1,1-dimethyl-4-phenyl-1-silacyclopent-3-ene (**3s**)

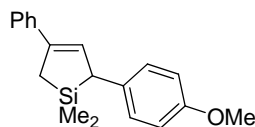

**3s**

According to the *Procedure B*, **2s** (229 mg, 0.97 mmol) was reacted with **1a** (268 mg, 1.1 mmol) for 3 h. Chromatography on silica gel (eluent: hexane/Et<sub>2</sub>O = 40/1, *R<sub>f</sub>* = 0.13) afforded **3s** as a colorless liquid (252 mg, 88%). <sup>1</sup>H NMR (400 MHz, CDCl<sub>3</sub>)  $\delta$  7.59 (d, *J* = 8.0 Hz, 2H), 7.32-7.38 (m, 2H), 7.23-7.28 (m, 1H), 6.95 (d, *J* = 6.8 Hz, 2H), 6.81 (d, *J* = 6.8 Hz, 2H), 6.40 (dt, *J* = 3.2, 1.6 Hz, 1H), 3.78 (s, 3H), 3.25-3.28 (m, 1H), 1.86 (dt, *J* = 17.2, 1.6 Hz, 1H), 1.78 (dt, *J* = 17.2, 1.6 Hz, 1H), 0.33 (s, 3H), -0.18 (s, 3H); <sup>13</sup>C NMR (CDCl<sub>3</sub>, 125 MHz)  $\delta$  156.8, 142.4, 140.3, 135.9, 130.7, 128.2, 127.2, 127.0, 125.8, 113.8, 55.3, 39.5, 19.3, -2.1, -4.1; HRMS (EI) *m/z* Calcd for C<sub>19</sub>H<sub>22</sub>OSi (M<sup>+</sup>): 294.1440. Found: 294.1441.



***cis*-1,1-Dimethyl-2,5-diphenyl-1-silacyclopent-3-ene (3t)**<sup>20</sup>

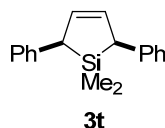

Pd(dba)<sub>2</sub> (4.6 mg, 8.0 μmol) and PPh<sub>2</sub>Me (1.9 mg, 9.6 μmol) were dissolved in toluene (400 μL) and the mixture was stirred for 5 min at room temperature. To a mixture was added **2t** (*EE* 100%, 83 mg, 0.40 mmol) and **1a** (159 mg, 0.62 mmol), and the mixture was stirred for 24 h at room temperature. Chromatography on silica gel (eluent: hexane/Et<sub>2</sub>O = 35/1, *R*<sub>f</sub> = 0.52) afforded **3t** as a colorless liquid (100 mg, 94%). <sup>1</sup>H NMR (400 MHz, CDCl<sub>3</sub>) δ 7.24-7.29 (m, 4H), 7.03-7.13 (m, 6H), 6.12 (s, 2H), 3.28 (s, 2H), 0.41 (s, 3H), -0.67 (s, 3H); <sup>13</sup>C NMR (CDCl<sub>3</sub>, 125 MHz) δ 143.4, 135.0, 128.3, 126.4, 124.3, 39.9, -2.8, -6.8; HRMS (EI) *m/z* Calcd for C<sub>18</sub>H<sub>20</sub>Si (M<sup>+</sup>): 264.1334. Found: 264.1342.

**2-(4-Trifluoromethylphenyl)-1,1-dimethyl-5-phenyl-1-silacyclopent-3-ene (3u)**

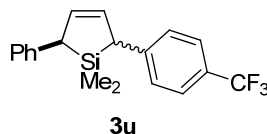

Pd(dba)<sub>2</sub> (6.9 mg, 12 μmol) and PPh<sub>2</sub>Me (2.9 mg, 14 μmol) were dissolved in toluene (400 μL) and the mixture was stirred for 5 min at room temperature. To a mixture was added **2u** (*EE:EZ*=21:79, 117 mg, 0.44 mmol) and **1a** (175 mg, 0.68 mmol), and the mixture was stirred for 12 h at 50 °C. Chromatography on silica gel (eluent: hexane/Et<sub>2</sub>O = 35/1, *R*<sub>f</sub> = 0.51) afforded **3u** as a colorless liquid (130 mg, 88%). The product was a mixture of *cis* and *trans* isomers (22:78). <sup>1</sup>H NMR of *trans* isomer (400 MHz, CDCl<sub>3</sub>) δ 7.51 (d, *J* = 8.4 Hz, 2H), 7.24-7.28 (m, 3H), 7.01-7.17 (m, 4H), 6.22-6.25 (m, 1H), 6.15-6.18 (m, 1H), 3.36-3.39 (m, 1H), 3.29-3.32 (m, 1H), -0.15 (s, 3H), -0.17 (s, 3H); Some characteristic signals of *cis* isomer δ 6.07-6.11 (m, 1H), 3.34-3.36 (m, 1H), 0.42 (s, 3H), -0.67 (s, 3H); <sup>13</sup>C NMR was omitted for the complexity due to the mixture of *cis/trans* isomer and C-F remote coupling. HRMS (EI) *m/z* Calcd for C<sub>19</sub>H<sub>19</sub>F<sub>3</sub>Si (M<sup>+</sup>): 332.1208. Found: 332.1200.

<sup>20</sup> Xiong, H.; Rieke, R. D. *J. Org. Chem.* **1989**, 54, 3247.

### 2.7.3 Conversion of 2,4- and 2,5-Diaryl-1-silacyclopent-3-enes to 2,4- and 2,5-Diarylsiloles

Dehydrogenation of several silacyclopent-3-enes **3** was examined (Table S2). Reaction of diaryl-substituted **3r** with DDQ or *p*-chloranil in benzene at room temperature gave diarylsilole **8** in good <sup>1</sup>H NMR yield (entries 1 and 2). However, the isolated yield of **8** was rather low due to decomposition of **8** via reaction with acidic hydroquinone derivatives (entry 2). Treatment of the reaction mixture with Et<sub>3</sub>N was found essential for isolation of the silole: **8** was obtained in 98% isolated yield after purification by column chromatography on silica gel (entry 3).

A 2,5-diphenylsilacyclopent-3-ene (**3t**) was less reactive than 2,4-diarylsubstituted **3r**: no silole formation was observed by *p*-chloranil (entry 6), whereas reaction with DDQ afforded silole **10** in 78% yield (entry 7). No dehydrogenation proceeded in reaction of 2,5-dibutyl-substituted *trans*-**3p** with DDQ (entry 8), indicating the conversion was applicable to the aryl-substituted substrates.

**Table S2.** Dehydrogenation of Silacyclopent-3-enes <sup>a</sup>

| entry | dihydrosilole                                                                                               | oxidant             | time (h) | work-up                        | yield (%) <sup>b</sup>            |
|-------|-------------------------------------------------------------------------------------------------------------|---------------------|----------|--------------------------------|-----------------------------------|
| 1     | <b>3r</b> (R <sup>1</sup> = H, R <sup>2</sup> = Ph, R <sup>4</sup> = 4-MeC <sub>6</sub> H <sub>4</sub> )    | DDQ                 | 1        | none                           | 64 ( <b>8</b> )                   |
| 2     | <b>3r</b>                                                                                                   | <i>p</i> -chloranil | 1        | none                           | 99 (25) <sup>c</sup> ( <b>8</b> ) |
| 3     | <b>3r</b>                                                                                                   | <i>p</i> -chloranil | 1        | Et <sub>3</sub> N <sup>d</sup> | 98 <sup>c</sup> ( <b>8</b> )      |
| 4     | <b>3r</b>                                                                                                   | benzoquinone        | 1        | none                           | 18 <sup>e</sup> ( <b>8</b> )      |
| 5     | <b>3r</b>                                                                                                   | anthraquinone       | 1        | none                           | 0 ( <b>8</b> )                    |
| 6     | <b>3t</b> (R <sup>1</sup> = Ph, R <sup>2</sup> = H, R <sup>4</sup> = Ph)                                    | <i>p</i> -chloranil | 12       | none                           | 0 ( <b>10</b> )                   |
| 7     | <b>3t</b>                                                                                                   | DDQ                 | 12       | Et <sub>3</sub> N <sup>d</sup> | 78 <sup>c</sup> ( <b>10</b> )     |
| 8     | <i>trans</i> - <b>3p</b> (R <sup>1</sup> = <i>n</i> -Bu, R <sup>2</sup> = H, R <sup>4</sup> = <i>n</i> -Bu) | DDQ                 | 12       | none                           | 0                                 |

<sup>a</sup> **3** (0.30 mmol) was reacted with oxidant (0.33 mmol) in benzene (6.0 mL) at room temperature. <sup>b</sup> NMR yield.

<sup>c</sup> Isolated yield. <sup>d</sup> 2.4 equiv of Et<sub>3</sub>N was added after the reaction. <sup>e</sup> Conversion of **3r**.

### 1,1-Dimethyl-2,4-diphenylsilole (**7**)<sup>21</sup>

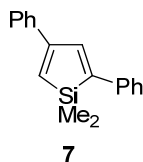

Typical procedure was given for the synthesis of **7**. To a solution of **3i** (119 mg, 0.45 mmol) in benzene (9.0 mL) under an atmosphere of argon was added *p*-chloranil (122 mg, 0.50 mmol) at one portion. The mixture was stirred for 1 h at room temperature. NEt<sub>3</sub> (126 mg, 1.2 mmol) was added, and the mixture was stirred for 10 min. Resulting suspension was purified by column chromatography on silica gel (hexane/ether = 30/1, *R<sub>f</sub>* = 0.43) to afford the silole **7** (115 mg, 97%) as colorless liquid. <sup>1</sup>H NMR (400 MHz, C<sub>6</sub>D<sub>6</sub>) δ 7.63 (d, *J* = 2.0 Hz, 1H), 7.55-7.58 (m, 2H), 7.44-7.48 (m, 2H), 7.18-7.25 (m, 4H), 7.09-7.15 (m, 2H), 6.28 (d, *J* = 2.0 Hz, 1H), 0.33 (s, 6H); <sup>1</sup>H NMR (400 MHz, CDCl<sub>3</sub>) δ 7.62-7.65 (m, 2H), 7.61 (d, *J* = 1.6 Hz, 1H), 7.46-7.49 (m, 2H), 7.31-7.42 (m, 6H), 6.32 (d, *J* = 1.6 Hz, 1H), 0.45 (s, 6H); <sup>13</sup>C NMR (125 MHz, C<sub>6</sub>D<sub>6</sub>) δ 157.5, 147.7, 139.7, 139.5, 139.4, 129.0, 128.7, 128.3, 127.4, 126.9, 126.5, 125.2, -3.7; <sup>13</sup>C NMR (125 MHz, CDCl<sub>3</sub>) δ 156.7, 147.2, 139.3, 139.0, 138.9, 128.7, 128.4, 128.0, 127.0, 126.5, 126.0, 125.2, -3.7; HRMS (EI) *m/z* Calcd for C<sub>18</sub>H<sub>18</sub>Si (M<sup>+</sup>): 262.1178. Found: 262.1180.

### 1,1-Dimethyl-2-(4-methylphenyl)-4-phenylsilole (**8**)

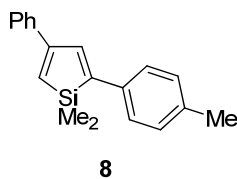

Silacyclopent-3-ene **3r** (83 mg, 0.30 mmol) was reacted with *p*-chloranil (82 mg, 0.33 mmol) in benzene (6.0 mL). After treatment with Et<sub>3</sub>N (71 mg, 0.70 mmol), the product was purified by column chromatography on silica gel (hexane/ether = 40/1, *R<sub>f</sub>* = 0.43) to afford the silole **8** (80 mg, 98%) as pale yellow liquid. <sup>1</sup>H NMR (500 MHz, CDCl<sub>3</sub>) δ 7.64-7.67 (m, 2H), 7.59 (d, *J* = 2.0 Hz, 1H), 7.39-7.43 (m, 4H), 7.32-7.36 (m, 1H), 7.19 (d, *J* = 8.0 Hz, 2H), 6.31 (d, *J* = 2.0 Hz, 1H), 2.38 (s, 3H), 0.45 (s, 6H); <sup>13</sup>C NMR (CDCl<sub>3</sub>, 125 MHz) δ 156.8, 147.0, 139.3, 137.9, 136.9, 136.2, 129.4, 128.4, 128.0, 126.4, 126.0, 124.7, 21.2, -3.6; HRMS (EI) *m/z* Calcd for C<sub>19</sub>H<sub>20</sub>Si (M<sup>+</sup>): 276.1334. Found: 276.1312.

<sup>21</sup> Ohmura, T.; Masuda, K.; Suginome, M. *J. Am. Chem. Soc.* **2008**, *130*, 1526.

### 2-(4-Methoxyphenyl)-1,1-dimethyl-4-phenylsilole (**9**)

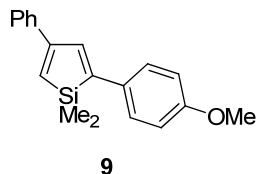

Silacyclopent-3-ene **3s** (102 mg, 0.35 mmol) was reacted with *p*-chloranil (94 mg, 0.38 mmol) in benzene (6.0 mL). After treatment with Et<sub>3</sub>N (82 mg, 0.81 mmol), the product was purified by column chromatography on silica gel (hexane/ether = 20/1, *R*<sub>f</sub> = 0.33) to afford the silole **9** (100 mg, 99%) as pale yellow liquid. <sup>1</sup>H NMR (400 MHz, CDCl<sub>3</sub>) δ 7.61-7.65 (m, 2H), 7.50 (d, *J* = 1.8 Hz, 1H), 7.36-7.44 (m, 4H), 7.29-7.35 (m, 1H), 6.88-6.93 (m, 2H), 6.25 (d, *J* = 1.8 Hz, 1H), 3.84 (s, 3H), 0.42 (s, 6H); <sup>13</sup>C NMR (CDCl<sub>3</sub>, 125 MHz) δ 158.8, 156.9, 146.9, 139.4, 136.7, 131.8, 128.4, 127.9, 127.6, 126.0, 124.0, 114.1, 55.2, -3.6; HRMS (EI) *m/z* Calcd for C<sub>19</sub>H<sub>20</sub>OSi (M<sup>+</sup>): 292.1283; Found 292.1284.

### 1,1-Dimethyl-2,5-diphenylsilole (**10**)<sup>22</sup>

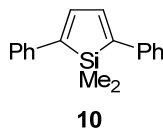

Silacyclopent-3-ene **3t** (78 mg, 0.30 mmol) was reacted with DDQ (80 mg, 0.35 mmol) in benzene (3 mL). The mixture was stirred for 12 h at room temperature. NEt<sub>3</sub> (95.6 mg, 0.94 mmol) was added, and the mixture was stirred for 10 min. Resulting suspension was purified by column chromatography on silica gel (hexane/ether = 20/1, *R*<sub>f</sub> = 0.59) to afford the silole **10** (61 mg, 78%) as yellow crystal (m.p. 108.0-110.0 °C, lit. 133 °C<sup>21</sup>). <sup>1</sup>H NMR (400 MHz, CDCl<sub>3</sub>) δ 7.43-7.47 (m, 4H), 7.32-7.38 (m, 4H), 7.31 (s, 2H), 7.20-7.25 (m, 2H), 0.54 (s, 6H); <sup>13</sup>C NMR (125 MHz, C<sub>6</sub>D<sub>6</sub>) δ 144.8, 138.8, 137.9, 128.7, 126.9, 126.2, -2.8; HRMS (EI) *m/z* Calcd for C<sub>18</sub>H<sub>18</sub>Si (M<sup>+</sup>): 262.1178. Found: 262.1182.

<sup>22</sup> Katkevics, M.; Yamaguchi, S.; Toshimitsu, A.; Tamao, K. *Organometallics* **1998**, *17*, 5796.

**2-(4-Trifluoromethylphenyl)-1,1-dimethyl-5-phenylsilole (**11**)**

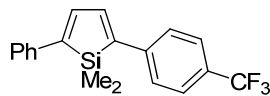

**11**

Silacyclopent-3-ene **3u** (125 mg, 0.38 mmol) was reacted with DDQ (106 mg, 0.47 mmol) in benzene (4.0 mL) for 12 h. After treatment with Et<sub>3</sub>N (102 mg, 1.0 mmol), the product was purified by column chromatography on silica gel (hexane/ether = 10/1, *R<sub>f</sub>* = 0.58) to afford the silole **11** (90 mg, 72%) as yellow crystal (m.p. 89.5-91.0 °C). <sup>1</sup>H NMR (400 MHz, CDCl<sub>3</sub>) δ 7.59 (d, *J* = 8.0 Hz, 2H), 7.51 (d, *J* = 8.0 Hz, 2H), 7.46 (d, *J* = 7.2 Hz, 2H), 7.30-7.40 (m, 4H), 7.23-7.29 (m, 1H), 0.55 (s, 6H); <sup>13</sup>C NMR (125 MHz, CDCl<sub>3</sub>) δ 146.4, 143.3, 142.4 (q, <sup>4</sup>*J*<sub>CF</sub> = 1.3 Hz), 140.3, 138.4, 137.5, 128.8, 128.4 (q, <sup>2</sup>*J*<sub>CF</sub> = 32.5 Hz), 127.3, 126.3, 126.2, 125.7 (q, <sup>3</sup>*J*<sub>CF</sub> = 3.8 Hz), 124.3 (q, <sup>1</sup>*J*<sub>CF</sub> = 271.8 Hz), -3.0; HRMS (EI) *m/z* Calcd for C<sub>19</sub>H<sub>17</sub> F<sub>3</sub>Si (M<sup>+</sup>): 330.1052. Found: 330.1051.

## 2.7.4 Photophysical Properties of Diarylsiloles 7-11

UV-visible spectra and fluorescence spectra were measured in CHCl<sub>3</sub> (nacalai, specially prepared reagent grade).

**Table S3.** Photophysical properties of siloles

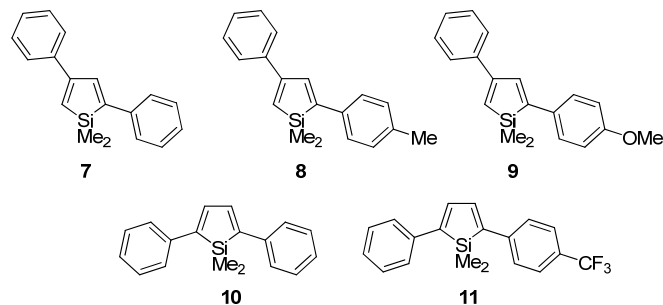

| silole                      | absorption                 |                    | emission <sup>a</sup>      |                     | stokes shift/nm |
|-----------------------------|----------------------------|--------------------|----------------------------|---------------------|-----------------|
|                             | $\lambda_{\max}/\text{nm}$ | $\log \varepsilon$ | $\lambda_{\max}/\text{nm}$ | $\Phi$ <sup>b</sup> |                 |
| <b>7</b>                    | 338                        | 3.30               | 452                        | 0.13                | 114             |
| <b>8</b>                    | 342                        | 3.69               | 392                        | 0.00040             | 48              |
| <b>9</b>                    | 352                        | 3.98               | 406                        | 0.010               | 54              |
| <b>10</b>                   | 375                        | 4.34               | 480                        | 0.27                | 93              |
| <b>10 lit.</b> <sup>c</sup> | 376                        | 4.24               | 463                        | 0.29                | 87              |
| <b>11</b>                   | 379                        | 4.30               | 452                        | 0.015               | 99              |

<sup>a</sup> Excited at  $\lambda_{\max}$  of absorption. <sup>b</sup> Quantum yield was determined with reference to quinine sulfate in 0.1 N H<sub>2</sub>SO<sub>4</sub> and anthracene in EtOH. <sup>c</sup> Katkevics, M.; Yamaguchi, S.; Toshimitsu, A.; Tamao, K. *Organometallics* **1998**, 17, 5796.

### 3 Copies of $^1\text{H}$ , and $^{13}\text{C}$ NMR Spectra of all new compounds that do not have elemental analysis data

$^1\text{H}$ , and  $^{13}\text{C}$  NMR spectra of **3a**, **3f**, **3m**, **3n**, **3r**, **8**, **9**, and **11** are shown in following pages.  $^1\text{H}$  NMR spectra of **3u** (*cis:trans* = 22:78) is also provided.

Pulse Sequence: s2pul  
Solvent: CDCl3  
Ambient temperature  
Mercury-400BB "Varian"

Relax. delay 1.500 sec  
Pulse 45.0 degrees  
Acq. time 3.500 sec  
Width 6006.0 Hz  
32 repetitions

32 REPLICATIONS  
OBSERVE H1, 400.4437675 MHz  
DATA PROCESSING  
PT size 65536  
Total time 3 min, 2 sec

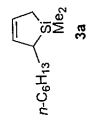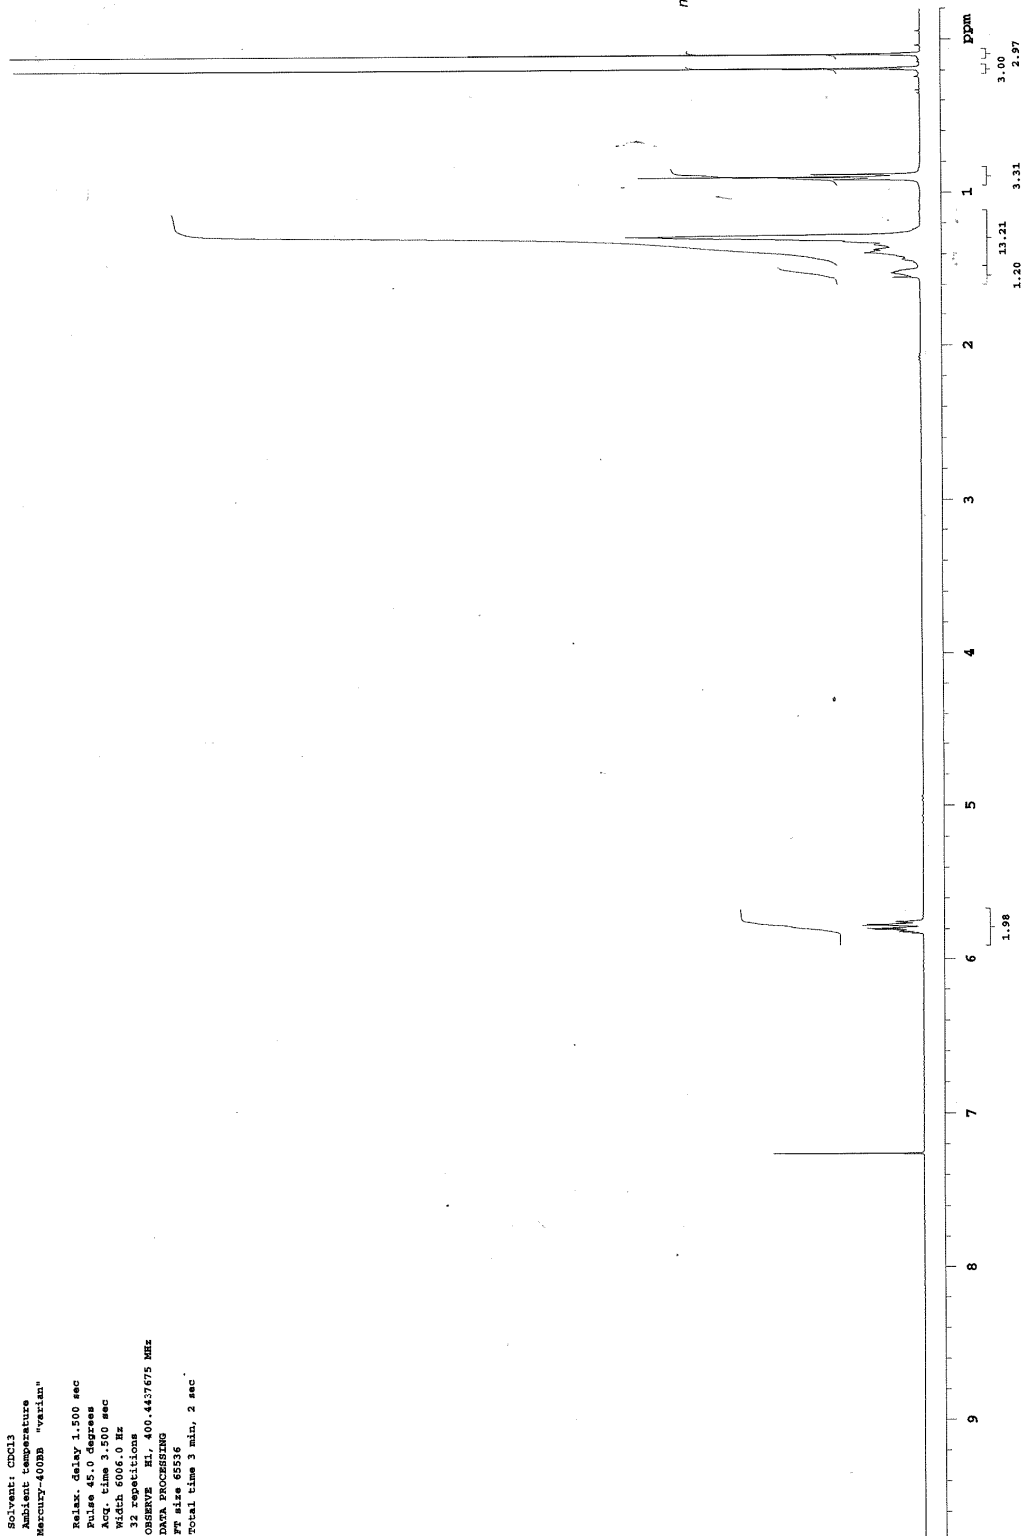





RM692

Pulse Sequence: #2pul

Solvent: CDCl3

Ambient temperature

Mercury-400DB "varian"

Relax. Delay 1.500 sec

Pulse 45.0 degrees

Acq. time 3.500 sec

Width 6006.0 Hz

24 repetitions

Observed 400.443768 MHz

DATA PROCESSING

FT size 65536

Total time 3 min, 2 sec

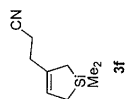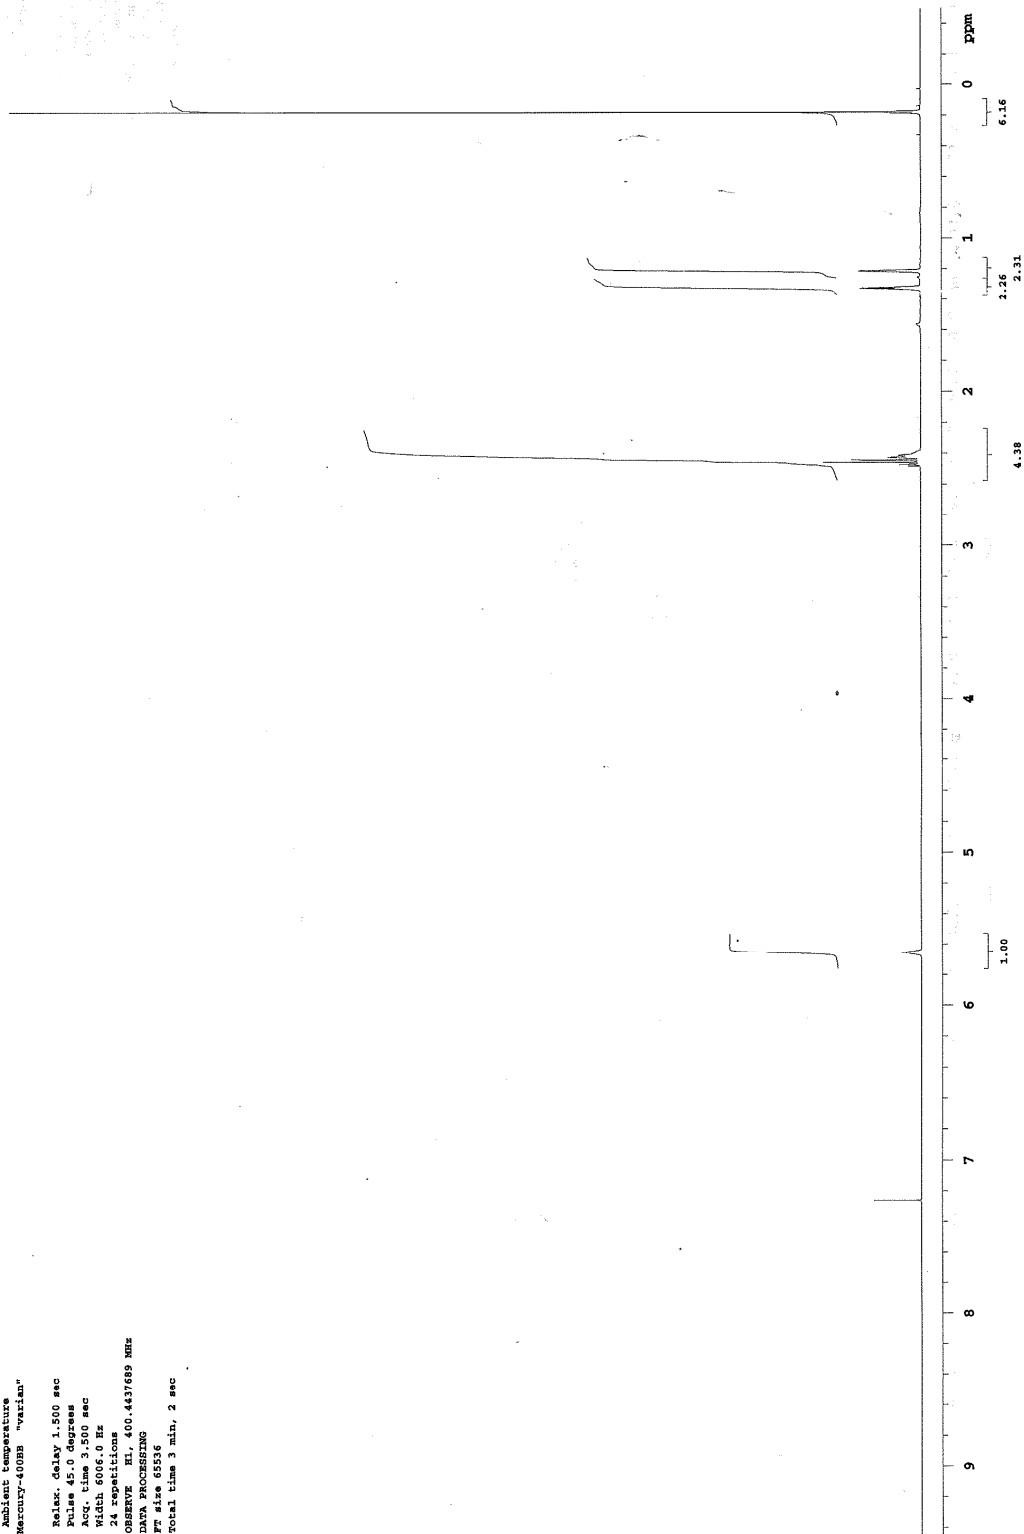

C:\NMR\PHARM\DATA\Sug\Inome\Masuda\KM92-BOM\_ALS

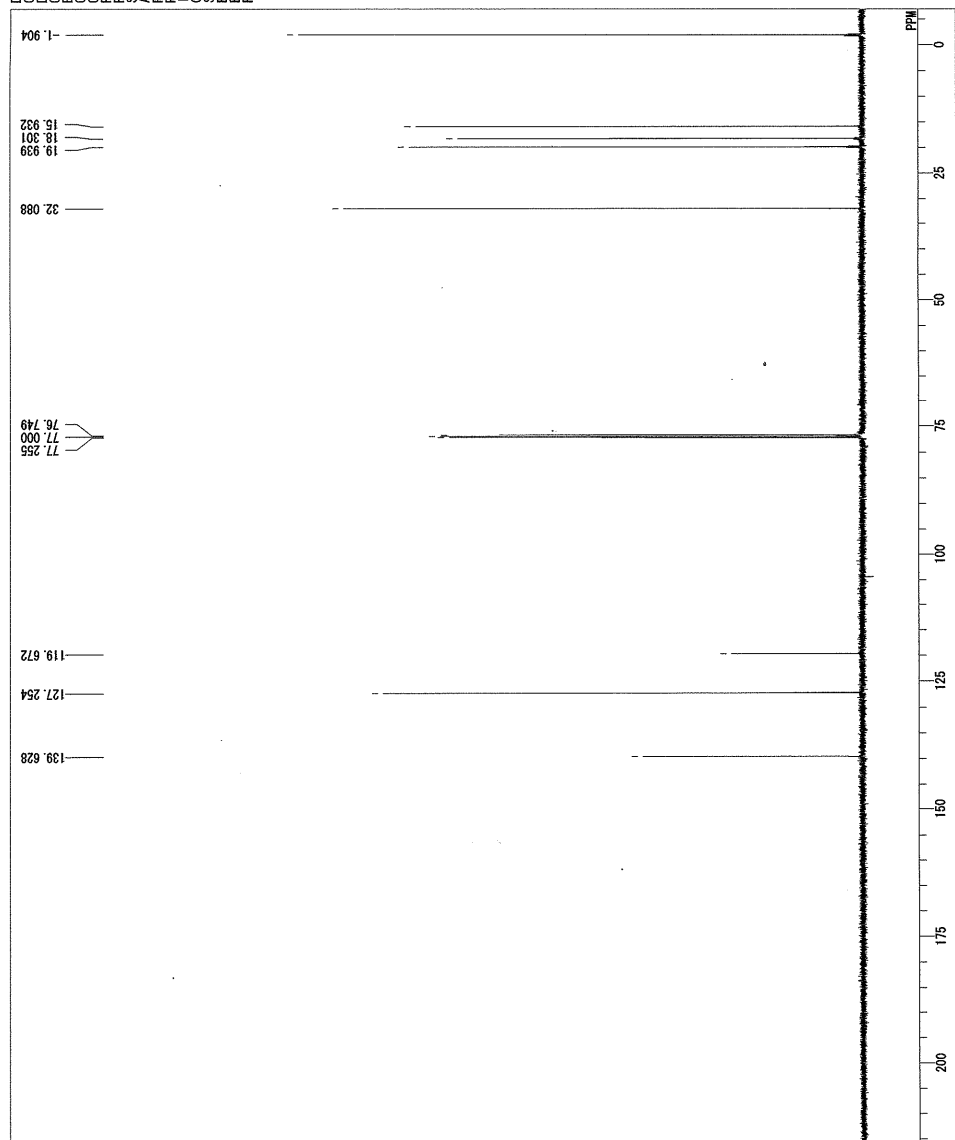

C:\NMR\PHARM\DATA\Sug\Inome\Masuda\KM92-BOM\_ALS

Fri Sep 14 21:57:38 2007

DETE  
 NAME  
 DATE  
 EXMOD  
 INTEL  
 OBSQ  
 POINT  
 FREQ  
 SCANS  
 ACQ  
 PUL  
 PRG  
 IRNUC  
 CTMP  
 SOLV  
 EXPT  
 BE  
 RGAIN

13C  
 128449.48 Hz  
 65536  
 28011.20 Hz  
 872  
 1.0000 sec  
 2.0000 sec  
 4.50 usec  
 26.1 o  
 CDCL3  
 77.00 ppm  
 0.43 Hz  
 33

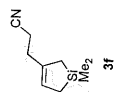

STANDARD 1H OBSERVE

Pulse Sequence: zgpg30  
 Solvent: CDCl3  
 Ambient temperature  
 Mercury-400B "varian"  
 Relax. Delay 1.500 sec  
 Pulse 45.0 degrees  
 Acq. time 3.500 sec  
 Width 6006.0 Hz  
 32 repetitions  
 Observed 400.4437671 MHz  
 DATA PROCESSING  
 FT size 65536  
 Total time 3 min, 2 sec

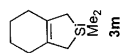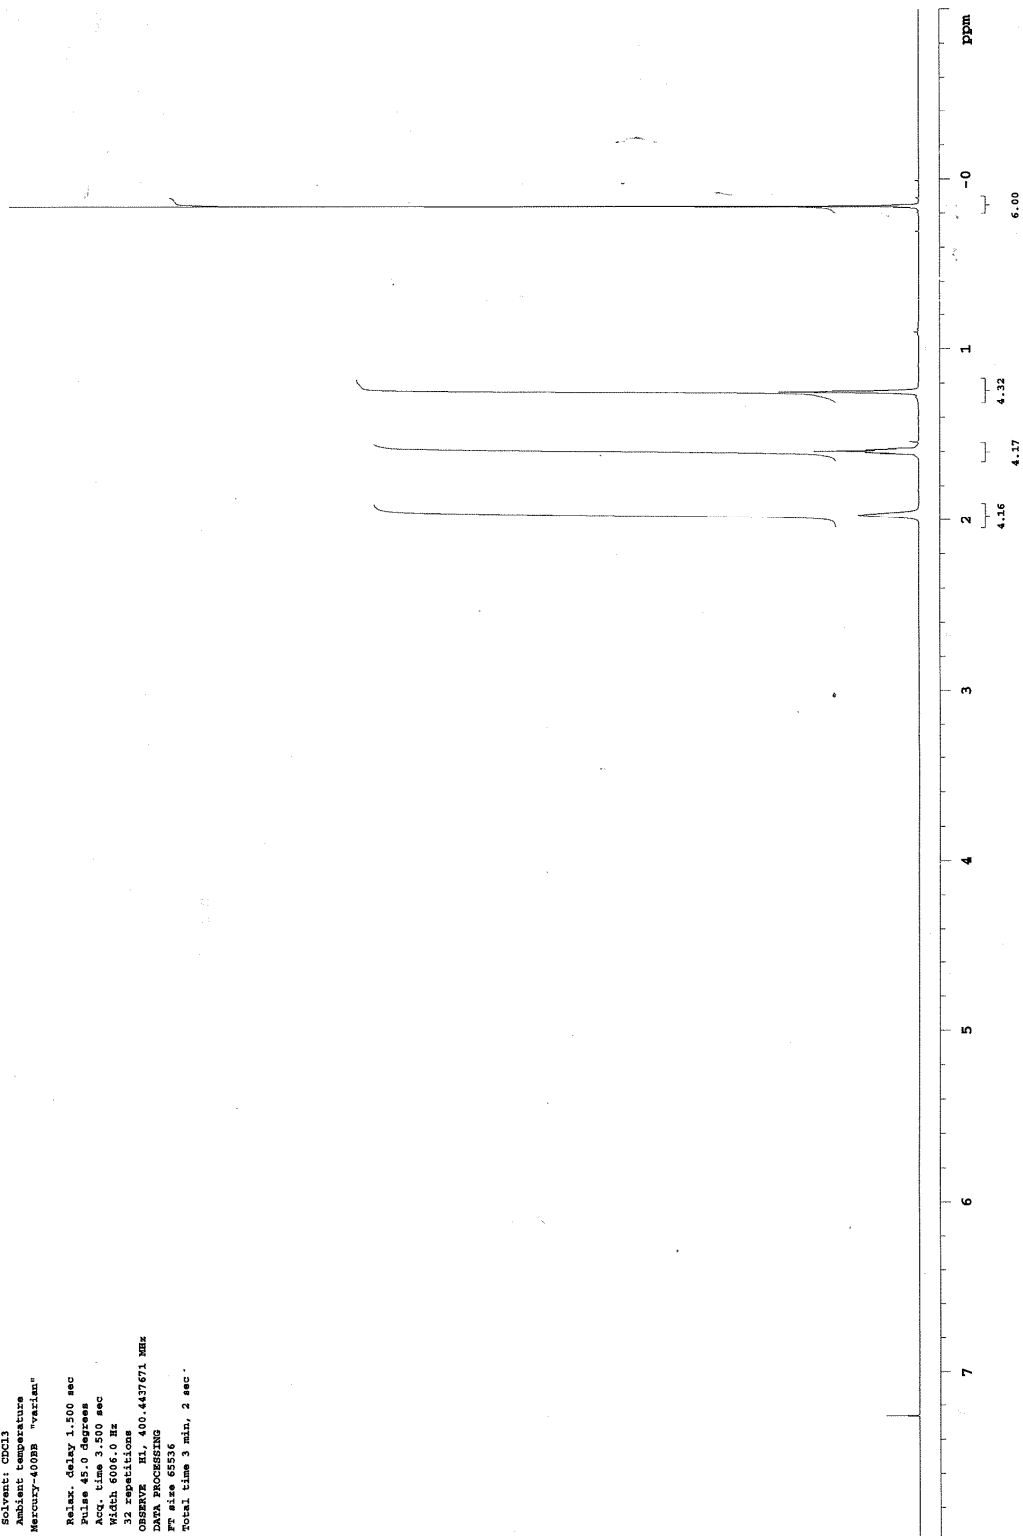

C:\N1\ALPHA\DATA\NSug\home\Masuda\KM639-50M\_ALS

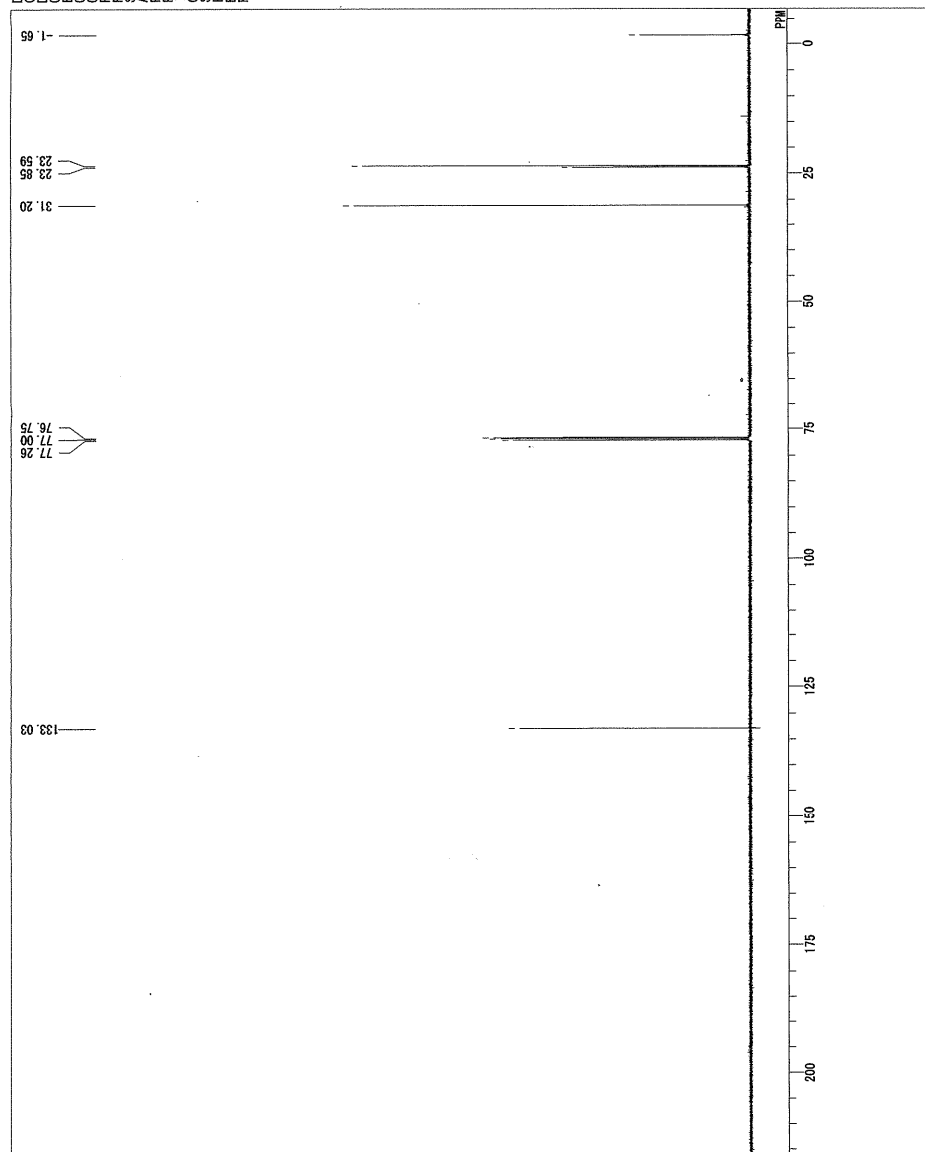

DF:FILE C:\N1\ALPHA\DATA\NSug\home\Masuda\KM639-50M\_ALS

CONVIT F-1 Jul 13 22:01:02 2007  
DENUM 130  
EXMID SINGL  
OBFRO 125.65 MHz  
OBFIN 128449.48 Hz  
COUNT 32768  
FREQU 28011.20 Hz  
SCANS 1620  
ACQTM 1.1688 sec  
POT 2.0000 sec  
PUL 4.30 usec  
IRNUC 1H  
CTEMP 26.6 c  
SLVIT 000.3  
SREF 77.26 ppm  
RGAIN 0.35

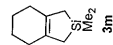

EN1336KD

Pulse Sequence: s2pul  
Solvent: CDCl3  
Ambient temperature  
Mercury-400NB "varian"

Relax. Delay 1.500 sec  
Pulse 45.0 degrees  
Acq. time 3.500 sec  
F2 400.146 MHz  
32 repetitions

OBSERVE H1, 400.4437690 MHz  
DATA PROCESSING  
FT size 65536  
Total time 3 min, 2 sec

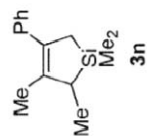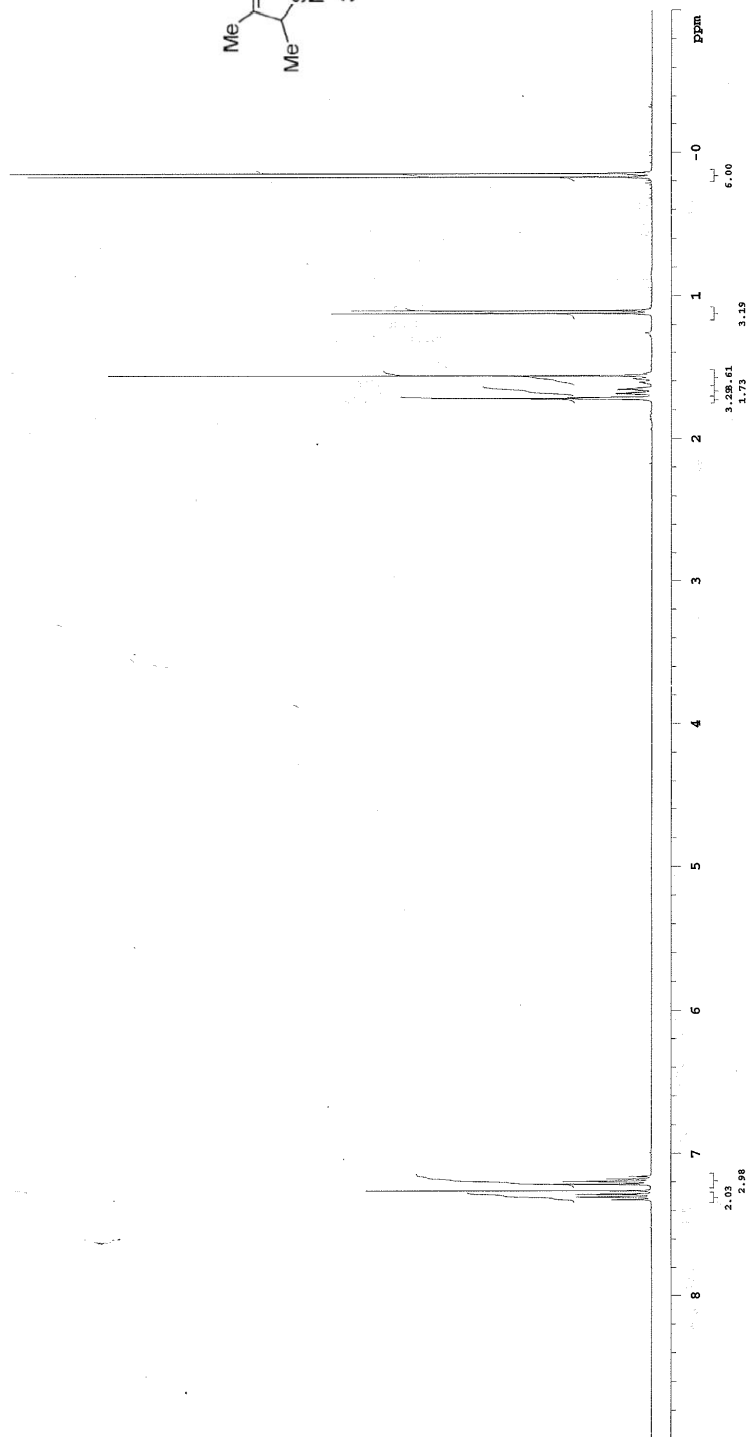



RM137C

Pulse Sequence: #2pul

Solvent: CDCl3

Ambient temperature

Mercury-400BB "varian"

Relax. delay 1.500 sec

Pulse 45.0 degrees

Acq. time 3.500 sec

Width 6006.0 Hz

Frequency 400.146 MHz

Observed 400.4437590 MHz

DATA PROCESSING

FT size 65536

Total time 3 min, 2 sec

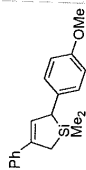

3s

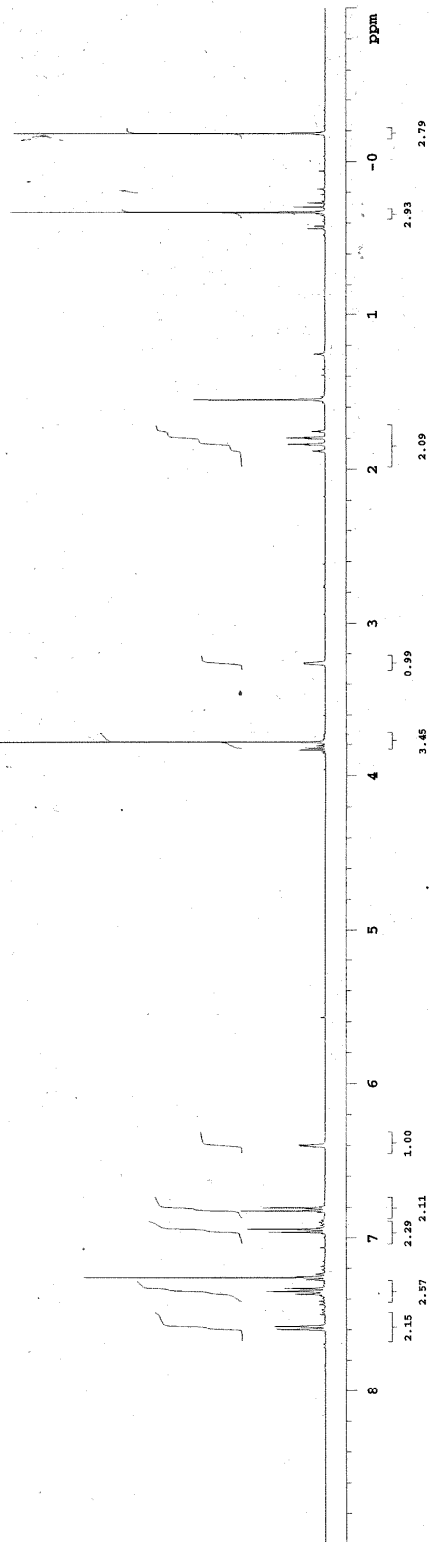



C:\WINALPHA\DATA\ANALYSIS\BIO\Masuda\KM1037-BCM.ALS  
 D:\WINALPHA\DATA\ANALYSIS\BIO\Masuda\KM1037-BCM.ALS  
 DATE: Wed Nov 19 08:54:15 2008  
 DEFILE: C:\WINALPHA\DATA\ANALYSIS\BIO\Masuda\KM1037-BCM.ALS  
 NAME: KM1037-BCM  
 ORIGIN: 13C  
 EXMID: SINGL  
 OBPRQ: 125.65 MHz  
 P1: 12.45 sec  
 P2: 12.45 sec  
 FREQ: 280.1120 Hz  
 SCANS: 12200  
 ACQTM: 1.1688 sec  
 P3: 2.0000 sec  
 P4: 4.50 usec  
 PRG: 1H  
 IPRNG: 21.8 o  
 CTMP: 77.00 ppm  
 SLVNT: CDCL3  
 DEPRF: 0.35 Hz  
 REAIN: 35

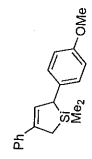

3s

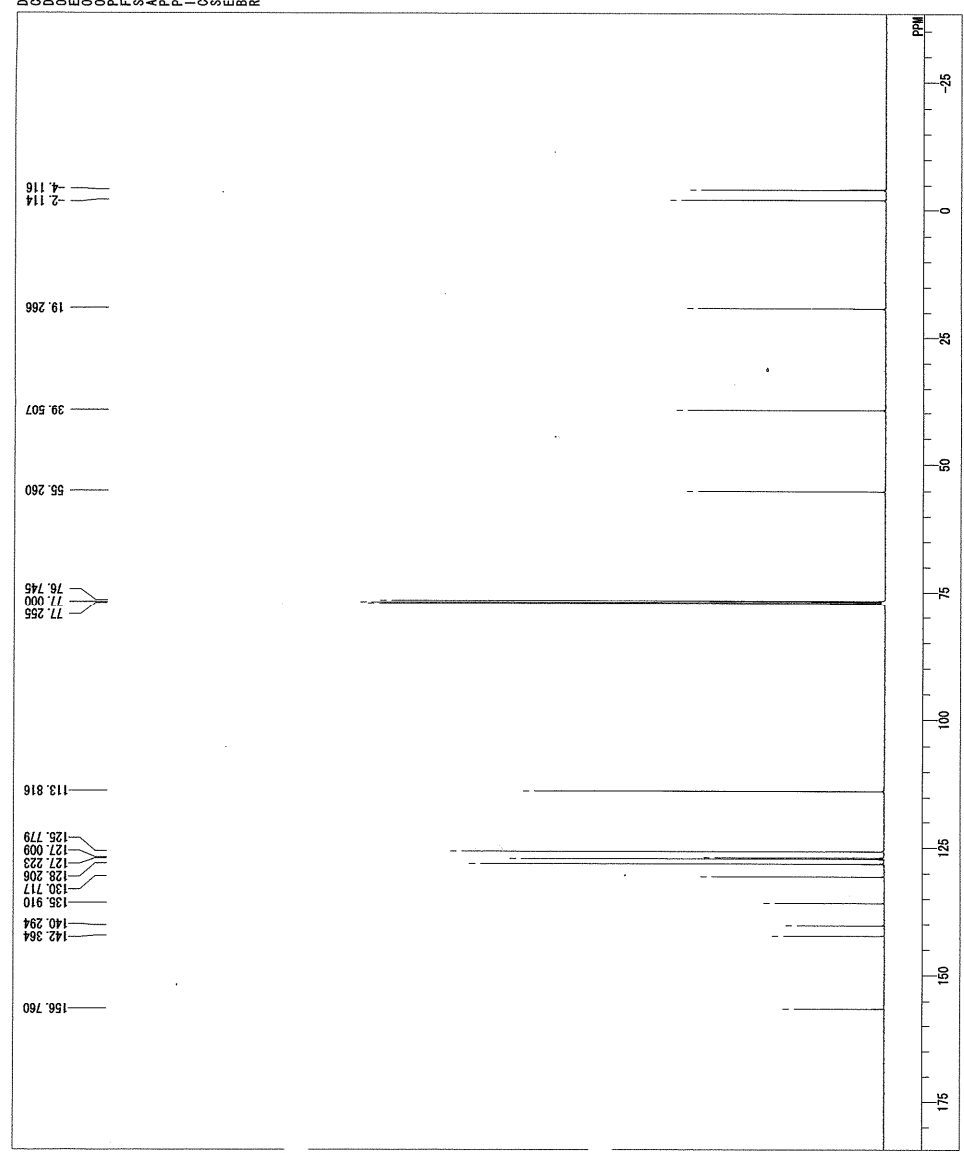

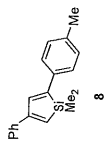

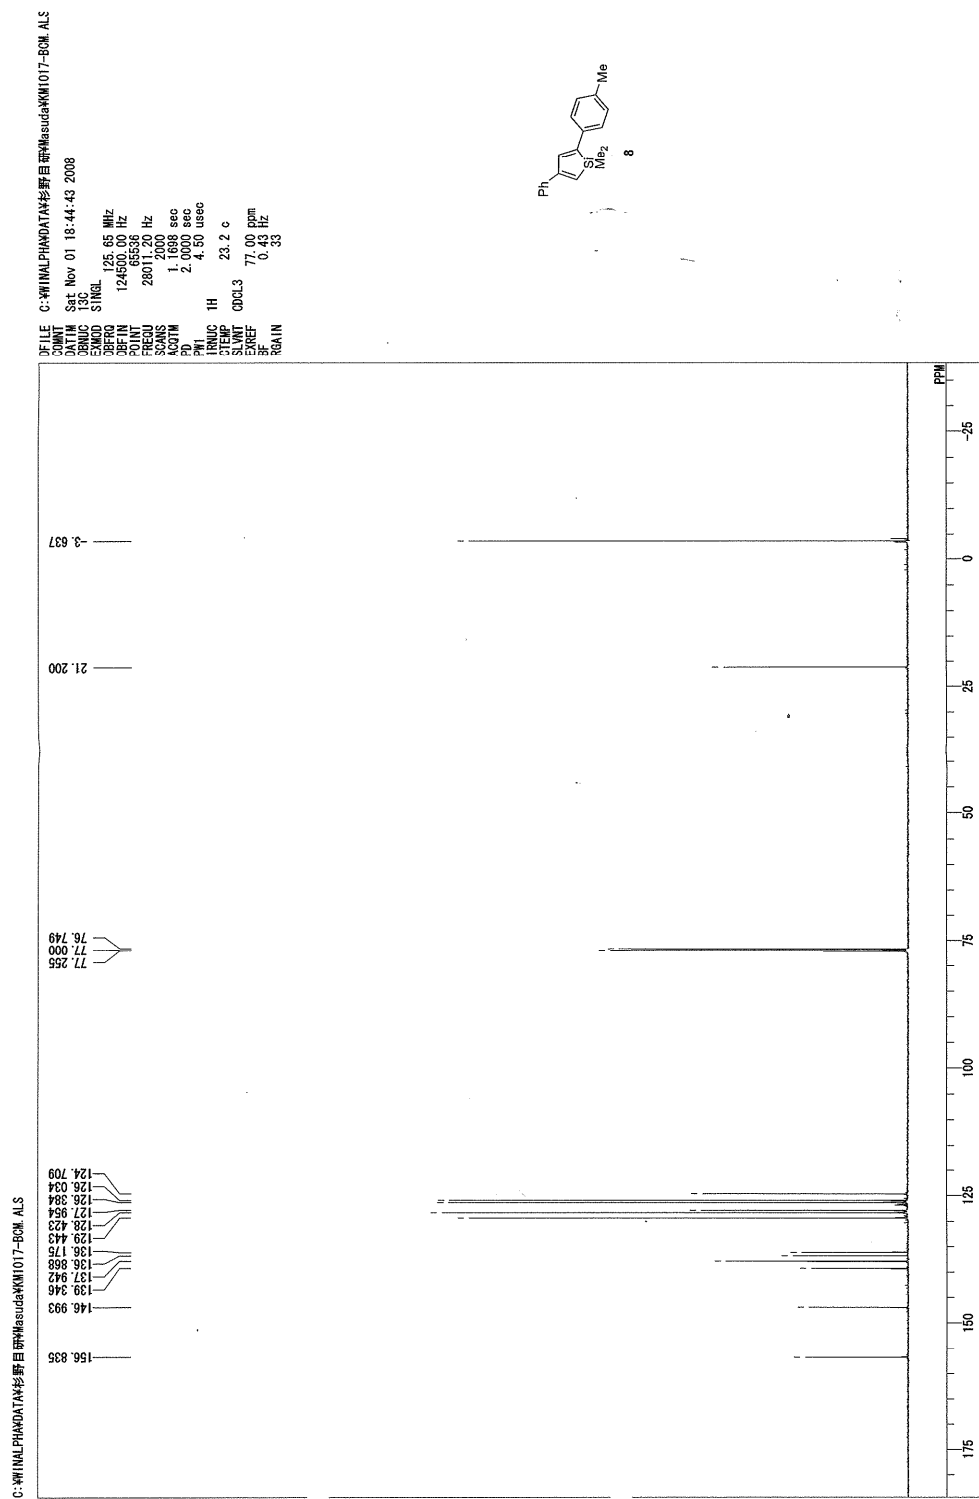

RM1045C

Pulse Sequence: zgpg30

Solvent: CDCl3

Ambient temperature

Mercury-400WB "varian"

Relax. delay 1.500 sec

Pulse 45.0 degrees

Acq. time 3.500 sec

Width 6006.0 Hz

24 repetitions

Observed frequency 400.4437689 MHz

Chemical shift 0.000000000 ppm

DEPTNO 135

PT size 65536

Total time 3 min, 2 sec

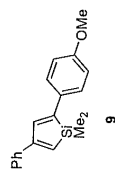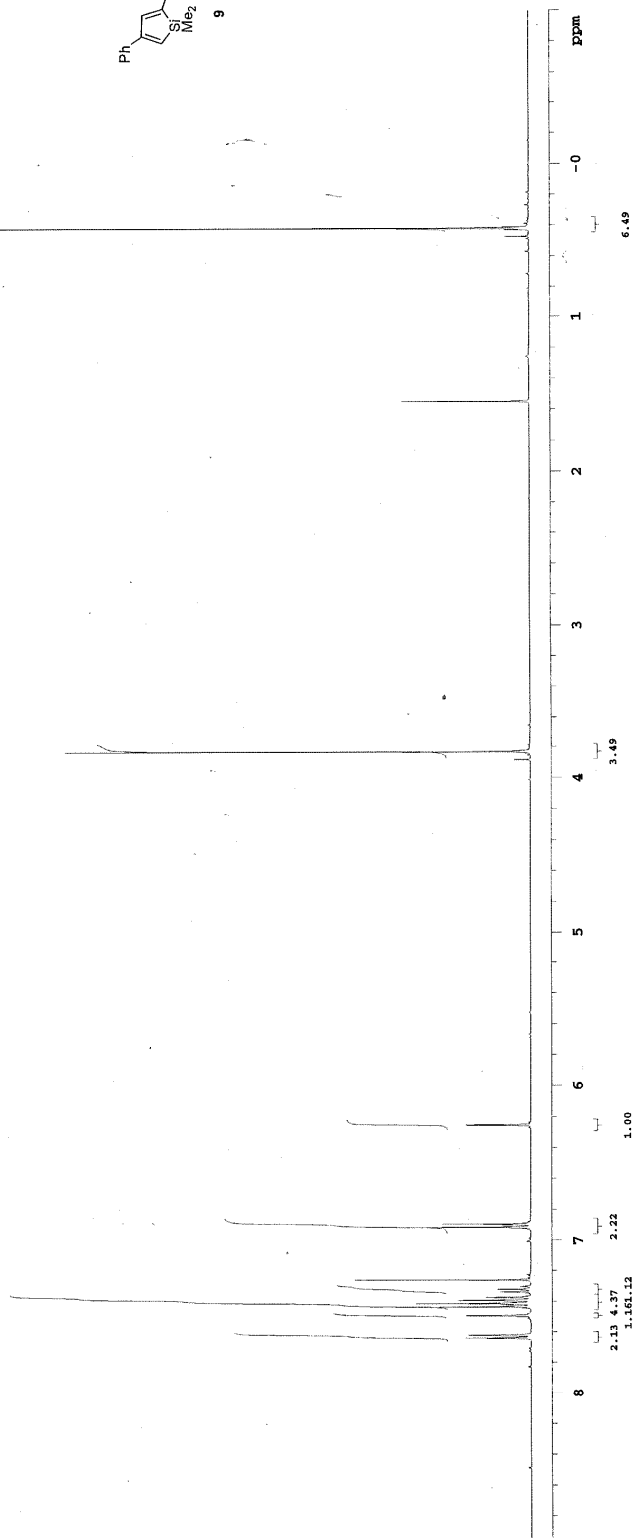



RM120C

Pulse Sequence: zgpg30

Solvent: CDCl3

Ambient temperature

Acquisition: 400BB "varian"

Relax. Delay: 1.500 sec

Pulse: 45.0 degrees

Acq. time: 3.500 sec

Width: 8006.0 Hz

Frequency: 400.145 MHz

Observation: 13C

DATA PROCESSING

FT size: 65536

Total time: 3 min, 2 sec

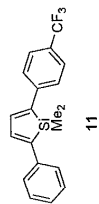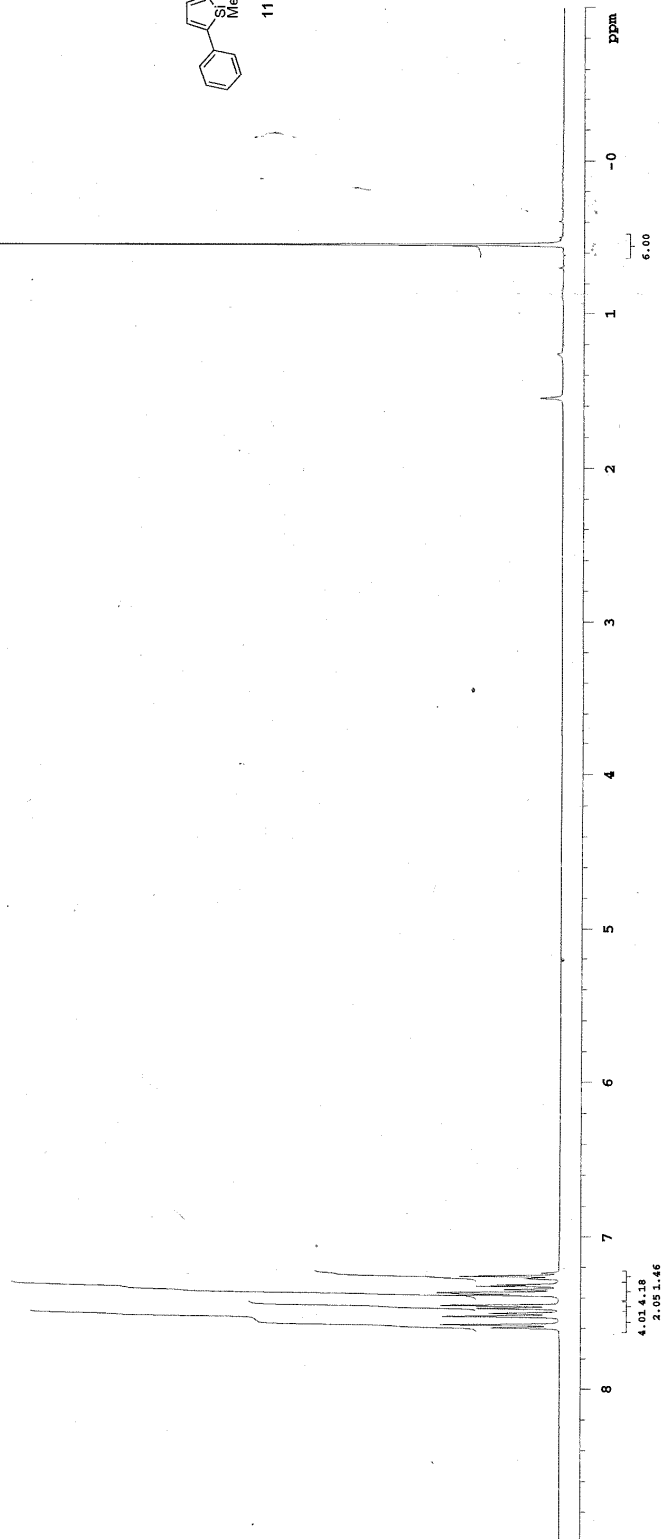

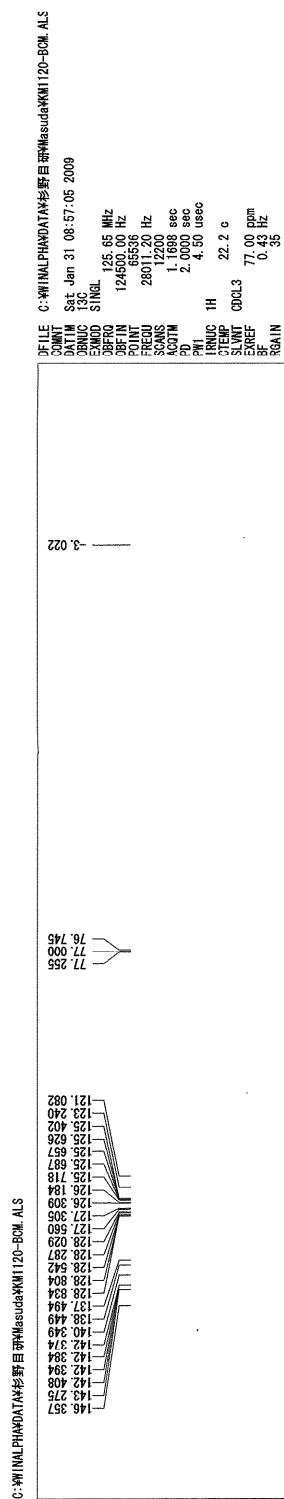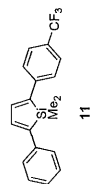

RM116C

Pulse Sequence: zgpg30

Solvent: CDCl3

Ambient temperature

Frequency: 400.138 MHz

Relax. delay: 1.500 sec

Pulse: 45.0 degrees

Acq. time: 3.500 sec

Width: 6000.0 Hz

Center: 400.138 MHz

Observed: 400.138 MHz

DATA PROCESSING

FT size: 65536

Total time: 3 min, 2 sec

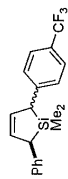

3u

cis:trans = 22:78

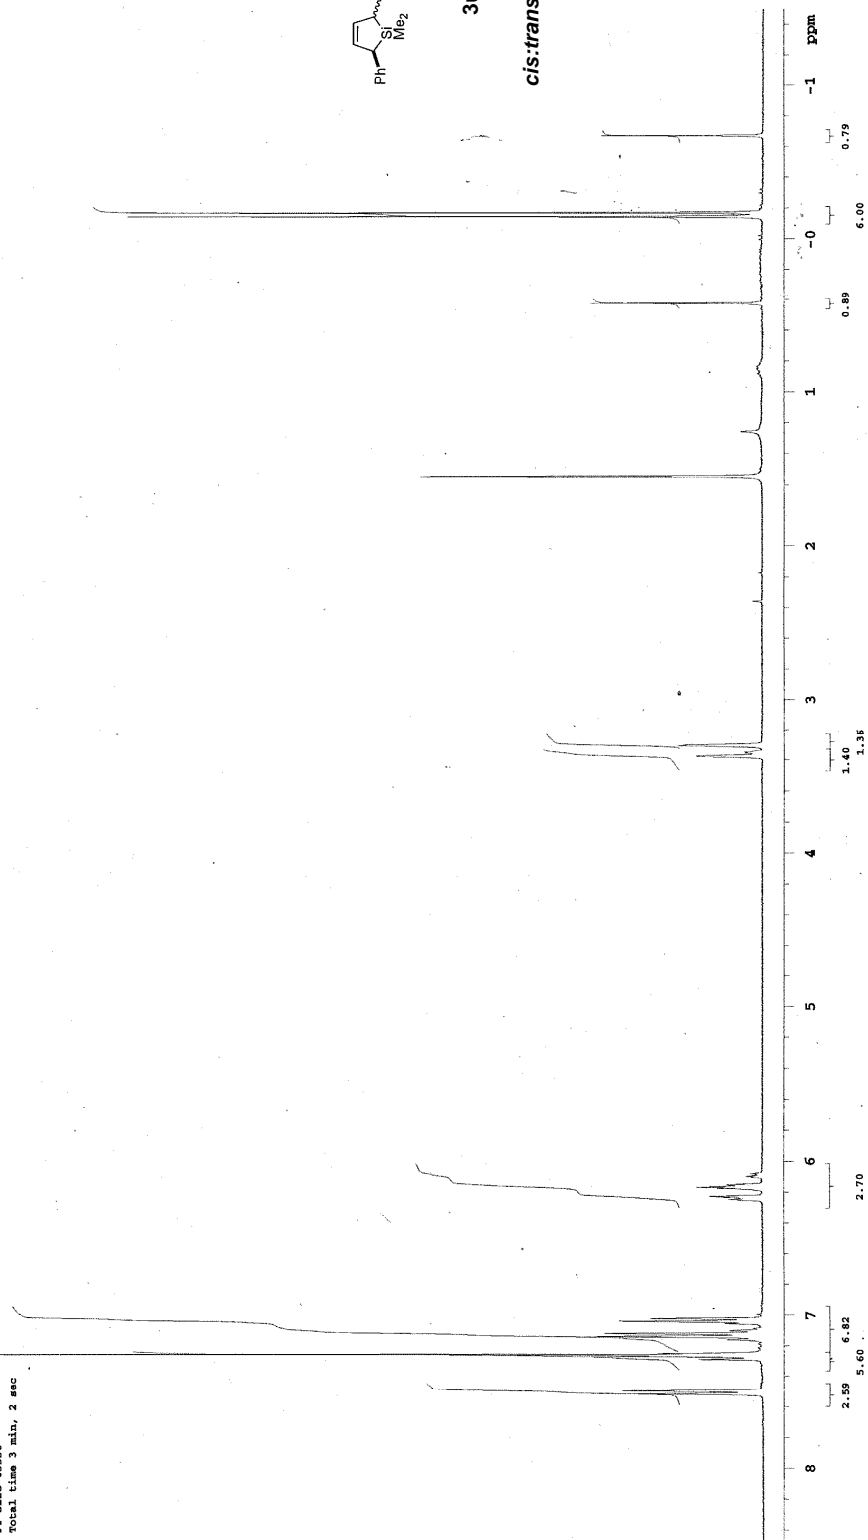

Supplement: Supplementary file 1 [file 4505119]
